# Supplementary material for: Are the testing needs of key European populations affected by hepatitis B and hepatitis C being addressed? A scoping review of testing studies in Europe
Source: PubMed Central journal article supplement (PMC5141462; doi:10.3325/cmj.2016.57.442), 2016-10
Supplement: CroatMedJ_57_s002.pdf [file CroatMedJ_57_s002.pdf]

## Supplementary material 2: studies included in review

| Country                            | Reference                                                                                                                                                                                                                                     | Study design                    | Sample size (N)                          | Study population | Study setting                | Number of study participants tested     | Disease test sought to detect | % tested                                  | Viral hepatitis prevalence (%)                                                             | Were study participants informed of test results? |
|------------------------------------|-----------------------------------------------------------------------------------------------------------------------------------------------------------------------------------------------------------------------------------------------|---------------------------------|------------------------------------------|------------------|------------------------------|-----------------------------------------|-------------------------------|-------------------------------------------|--------------------------------------------------------------------------------------------|---------------------------------------------------|
| <b><i>People who use drugs</i></b> |                                                                                                                                                                                                                                               |                                 |                                          |                  |                              |                                         |                               |                                           |                                                                                            |                                                   |
| United Kingdom                     | 20. Abouh-Saleh M et al. <b>The effectiveness of behavioral interventions in the primary prevention of hepatitis C amongst injecting drug users: A randomised controlled trial and lessons learned.</b> <i>Harm Reduction Journal</i> 2008;5. | Randomised controlled trial     | 521                                      | PWID             | Drug treatment services      | 291                                     | HCV                           | 55.9                                      | 29.2 anti-HCV-positive                                                                     | Yes                                               |
| United Kingdom                     | 21. Anderson EM et al. <b>Evaluation of a general practice based hepatitis C screening intervention.</b> <i>Scottish Medical Journal</i> 2009, August, 54.                                                                                    | Non-randomised controlled trial | Intervention arm: 421<br>Control arm: NA | PWID             | General practitioner clinics | Intervention arm: 117<br>Control arm: 0 | HCV                           | Intervention arm: 27.8%<br>Control arm: 0 | Intervention arm: 12.8 anti-HCV-positive; 7.7 HCV-RNA-positive<br>Control arm: none tested | Yes                                               |

| Country        | Reference                                                                                                                                                                                                            | Study design                | Sample size (N) | Study population | Study setting                                       | Number of study participants tested | Disease test sought to detect | % tested | Viral hepatitis prevalence (%)                                   | Were study participants informed of test results? |
|----------------|----------------------------------------------------------------------------------------------------------------------------------------------------------------------------------------------------------------------|-----------------------------|-----------------|------------------|-----------------------------------------------------|-------------------------------------|-------------------------------|----------|------------------------------------------------------------------|---------------------------------------------------|
| Sweden         | 22. Blomé et al. <b>Minimal transmission of HCV despite persistently high transmission of hepatitis C virus in a Swedish needle exchange program.</b> <i>Journal of Viral Hepatitis</i> , 2011, 18: 831-839.         | Retro-spective cohort study | 1183            | PWID             | Needle exchange programme                           | 1183                                | HBV, HCV                      | 100      | 32.1 anti-HBc-positive<br>64.1 anti-HCV-positive                 | NA                                                |
| United Kingdom | 23. Brant LJ et al. <b>Diagnosis of acute hepatitis C virus infection and estimated incidence in low- and high-risk English populations.</b> <i>Journal of Viral Hepatitis</i> 2008, 15: 871-877.                    | Retro-spective cohort study | 390             | PWID             | NA (serological samples obtained from laboratories) | 390                                 | HCV                           | 100      | 2.1 anti-HCV-negative and HCV-RNA-positive (acute HCV infection) | NA                                                |
| United Kingdom | 24. Craine N et al. <b>Improving blood-borne viral diagnosis; clinical audit of the uptake of dried blood spot testing offered by a substance misuse service.</b> <i>Journal of Viral Hepatitis</i> 2009, 16: March. | Cross-sectional study       | 202             | PWID             | Drug treatment centre                               | 202                                 | HCV                           | 100      | NA                                                               | Yes                                               |

| Country        | Reference                                                                                                                                                                                                                        | Study design             | Sample size (N) | Study population | Study setting                                                                                                                                            | Number of study participants tested | Disease test sought to detect | % tested | Viral hepatitis prevalence (%) | Were study participants informed of test results? |
|----------------|----------------------------------------------------------------------------------------------------------------------------------------------------------------------------------------------------------------------------------|--------------------------|-----------------|------------------|----------------------------------------------------------------------------------------------------------------------------------------------------------|-------------------------------------|-------------------------------|----------|--------------------------------|---------------------------------------------------|
| United Kingdom | 25. Craine N et al. <b>Incidence of hepatitis C in drug injectors: the role of homelessness, opiate substitution treatment, equipment sharing and community size.</b><br><i>Epidemiology and Infection</i> 2009, 137: 1255-1265. | Prospective cohort study | 700             | PWID             | Not specified (participants recruited from field stations including drug treatment services, needle exchange programmes and hostels for homeless people) | 700                                 | HCV                           | 100      | 26.3 anti-HCV-positive         | yes                                               |

| Country | Reference                                                                                                                                                                                          | Study design                | Sample size (N) | Study population                                                                                           | Study setting          | Number of study participants tested | Disease test sought to detect | % tested | Viral hepatitis prevalence (%)                   | Were study participants informed of test results? |
|---------|----------------------------------------------------------------------------------------------------------------------------------------------------------------------------------------------------|-----------------------------|-----------------|------------------------------------------------------------------------------------------------------------|------------------------|-------------------------------------|-------------------------------|----------|--------------------------------------------------|---------------------------------------------------|
| Italy   | 26. Curcio F et al.<br><b>Epidemiological survey of hepatitis C virus infection in a cohort of patients from a ser.t in Naples, Italy.</b><br><i>Journal of Addiction Medicine</i> 2011, 5: 43-49. | Retro-spective cohort study | 1753            | Patients at drug addiction centre (for injecting drug use, non-injecting drug use and alcohol consumption) | Drug treatment centres | 1753                                | HCV                           | 100      | 48.1<br>HCV-positive (marker not specified)      | NA                                                |
| Cyprus  | 27. Demetriou VL et al.<br><b>Hepatitis C infection among intravenous drug users attending therapy programs in Cyprus.</b><br><i>Journal of Medical Virology</i> 2010, 82: 263-270.                | Cross-sectional study       | 40              | PWID                                                                                                       | Detoxification centres | 40                                  | HBV, HCV                      | 100      | 0<br>HBsAg-positive<br>50.0<br>anti-HCV-positive | NA                                                |

| Country        | Reference                                                                                                                                                                                                                   | Study design             | Sample size (N) | Study population                                   | Study setting                                                        | Number of study participants tested | Disease test sought to detect | % tested | Viral hepatitis prevalence (%)                   | Were study participants informed of test results? |
|----------------|-----------------------------------------------------------------------------------------------------------------------------------------------------------------------------------------------------------------------------|--------------------------|-----------------|----------------------------------------------------|----------------------------------------------------------------------|-------------------------------------|-------------------------------|----------|--------------------------------------------------|---------------------------------------------------|
| France         | 28. Foucher J et al. <b>FibroScan used in street-based outreach for drug users is useful for hepatitis C virus screening and management: a prospective study.</b> <i>Journal of Viral Hepatitis</i> , 2009, 16: 121-131.    | Prospective cohort study | 198             | People who use drugs (injecting and non-injecting) | Not specified (participants recruited through street-based outreach) | 154                                 | HCV                           | 77.8     | 9.8 HCV-RNA-positive                             | Yes                                               |
| United Kingdom | 29. Hope V et al. <b>Frequency, factors and costs associated with injection site infections: Findings from a national multi-site survey of injecting drug users in England.</b> <i>BMC Infectious Diseases</i> 2008, 8:120. | Cross-sectional study    | 1058            | PWID                                               | Services for drug users and community settings                       | 1058                                | HBV, HCV                      | 100      | 32.0 anti-HBc-positive<br>53.0 anti-HCV-positive | NA                                                |
| United Kingdom | 30. Hope V et al. <b>Hepatitis C infection among recent initiates to injecting in England 2000-2008: Is a national HCV action plan making a difference?</b> <i>Journal of Viral Hepatitis</i> 2012, 19: 55-64.              | Cross-sectional study    | 3463            | PWID                                               | Services for drug users                                              | 3463                                | HCV                           | 100      | 17.9 anti-HCV-positive                           | Yes                                               |

| Country        | Reference                                                                                                                                                                                                                                                | Study design          | Sample size (N) | Study population                                   | Study setting                                                    | Number of study participants tested | Disease test sought to detect | % tested        | Viral hepatitis prevalence (%) | Were study participants informed of test results? |
|----------------|----------------------------------------------------------------------------------------------------------------------------------------------------------------------------------------------------------------------------------------------------------|-----------------------|-----------------|----------------------------------------------------|------------------------------------------------------------------|-------------------------------------|-------------------------------|-----------------|--------------------------------|---------------------------------------------------|
| United Kingdom | 31. Hope VD et al. <b>Measuring the incidence, prevalence and genetic relatedness of hepatitis C infections among a community recruited sample of injecting drug users, using dried blood spots.</b> <i>Journal of Viral Hepatitis</i> 2011,18: 262-270. | Cross-sectional study | 299             | PWID                                               | None (participants recruited through respondent-driven sampling) | 299                                 | HCV                           | 100             | 59.2 anti-HCV-positive         | NA                                                |
| France         | 32. Jauffret-Roustide M et al. <b>A national cross-sectional study among drug-users in France: Epidemiology of HCV and highlight on practical and statistical aspects of the design.</b> <i>BMC Infectious Diseases</i> 2009, 9: 113.                    | Cross-sectional study | 1462            | People who use drugs (injecting and non-injecting) | Drug user services and general practitioner practices            | 1155 <sup>1</sup>                   | HCV                           | 79 <sup>2</sup> | 59.8 anti-HCV-positive         | Yes                                               |

<sup>1</sup> Approximation.

<sup>2</sup> Approximation.

| Country     | Reference                                                                                                                                                                                                                | Study design             | Sample size (N) | Study population                                   | Study setting                                                  | Number of study participants tested | Disease test sought to detect | % tested | Viral hepatitis prevalence (%)                  | Were study participants informed of test results? |
|-------------|--------------------------------------------------------------------------------------------------------------------------------------------------------------------------------------------------------------------------|--------------------------|-----------------|----------------------------------------------------|----------------------------------------------------------------|-------------------------------------|-------------------------------|----------|-------------------------------------------------|---------------------------------------------------|
| Sweden      | 33. Lidman C et al. <b>Hepatitis C infection among injection drug users in Stockholm Sweden: prevalence and gender.</b> <i>Scandinavian Journal of Infectious Diseases</i> 2009, 41: 679-684.                            | Cross-sectional study    | 310             | PWID                                               | Drug user services including inpatient and outpatient services | 310                                 | HBV, HCV                      | 100      | 52.3 HBsAg-positive<br>86.5 anti-HCV-positive   | NA                                                |
| Netherlands | 34. Lindenburg CEA et al. <b>Hepatitis C testing and treatment among active drug users in Amsterdam: Results from the DUTCH-C project.</b> <i>European Journal of Gastroenterology and Hepatology</i> 2011, 23: January. | Prospective cohort study | 497             | People who use drugs (injecting and non-injecting) | Public Health Service Amsterdam                                | 449                                 | HCV                           | 90.3     | 59.5 anti-HCV-positive<br>29.8 HCV-RNA-positive | Yes                                               |
| Israel      | 35. Loebstein R et al. <b>Hepatitis C, B, and human immunodeficiency virus infections in illicit drug users in Israel: Prevalence and risk factors.</b> <i>Israel Medical Association Journal</i> 2008, 10: November.    | Cross-sectional study    | 1443            | People who use drugs (injecting and non-injecting) | National Center for Diagnosis of Drug Addicts                  | 1443                                | HBV, HCV                      | 100      | 3.5 HBsAg-positive<br>35.7 anti-HCV-positive    | Yes                                               |

| Country        | Reference                                                                                                                                                                                                        | Study design          | Sample size (N) | Study population | Study setting                                                                               | Number of study participants tested | Disease test sought to detect | % tested | Viral hepatitis prevalence (%)                   | Were study participants informed of test results? |
|----------------|------------------------------------------------------------------------------------------------------------------------------------------------------------------------------------------------------------------|-----------------------|-----------------|------------------|---------------------------------------------------------------------------------------------|-------------------------------------|-------------------------------|----------|--------------------------------------------------|---------------------------------------------------|
| United Kingdom | 36. McDonald SA et al. <b>Examination of the risk of reinfection with hepatitis C among injecting drug users who have been tested in Glasgow.</b> <i>International Journal of Drug Policy</i> 2012, 23: 353-357. | Cross-sectional study | 97,250          | PWID             | NA (data obtained from Health Protection Scotland database of hepatitis C testing activity) | 97,250                              | HCV                           | 100      | NA                                               | NA                                                |
| Denmark        | 37. Mössner BK et al. <b>Decline in hepatitis B infection observed after 11 years of regional vaccination among danish drug users.</b> <i>Journal of Medical Virology</i> 2010, 82:1635–1639.                    | Cross-sectional study | 374             | PWID             | Drug treatment centres                                                                      | 374                                 | HBV, HCV                      | 100      | 50.2 anti-HBc-positive<br>66.8 anti-HCV-positive | NA                                                |



| Country        | Reference                                                                                                                                                                                  | Study design          | Sample size (N)        | Study population                                   | Study setting                                     | Number of study participants tested | Disease test sought to detect | % tested               | Viral hepatitis prevalence (%)                   | Were study participants informed of test results?                                                                           |
|----------------|--------------------------------------------------------------------------------------------------------------------------------------------------------------------------------------------|-----------------------|------------------------|----------------------------------------------------|---------------------------------------------------|-------------------------------------|-------------------------------|------------------------|--------------------------------------------------|-----------------------------------------------------------------------------------------------------------------------------|
| United Kingdom | 38. O'Leary MC et al. <b>The association between alcohol use and hepatitis C status among injecting drug users in Glasgow.</b> <i>Drug and Alcohol Dependence</i> 2012, 123: 180-189.      | Cross-sectional study | 808                    | PWID                                               | Pharmacies; fixed-site needle exchange programmes | 780                                 | HCV                           | 96.5                   | 64.9 anti-HCV-positive                           | Participants did not get their results; those who wished to know their HCV status were referred to the appropriate services |
| Netherlands    | 39. Schreuder I et al. <b>Seroprevalence of HIV, hepatitis B and hepatitis C among opioid drug users on methadone treatment in the netherlands.</b> <i>Harm Reduction Journal</i> 2010, 7. | Cross-sectional study | HBV: 2024<br>HCV: 2566 | People who use drugs (injecting and non-injecting) | Methadone clinics                                 | HBV: 680<br>HCV: 1359               | HBV, HCV                      | HBV: 33.6<br>HCV: 53.0 | 33.1 anti-HBc-positive<br>25.8 anti-HCV-positive | Yes                                                                                                                         |

| Country        | Reference                                                                                                                                                                                                                                                                    | Study design                | Sample size (N) | Study population | Study setting                  | Number of study participants tested | Disease test sought to detect | % tested | Viral hepatitis prevalence (%) | Were study participants informed of test results? |
|----------------|------------------------------------------------------------------------------------------------------------------------------------------------------------------------------------------------------------------------------------------------------------------------------|-----------------------------|-----------------|------------------|--------------------------------|-------------------------------------|-------------------------------|----------|--------------------------------|---------------------------------------------------|
| Switzerland    | 40. Senn O et al. <b>Determinants of successful chronic hepatitis C case finding among patients receiving opioid maintenance treatment in a primary care setting.</b> <i>Addiction</i> 2009, 104: 2033-2038.                                                                 | Retro-spective cohort study | 387             | PWID             | General practitioner practices | 327                                 | HCV                           | 84.5     | 41.6 anti-HCV-positive         | NA                                                |
| United Kingdom | 41. Stephens BP et al. <b>Is it Worth Testing Unstable Drug Users For Hepatitis C?</b> Gut Conference: British Association for the Study of the Liver Annual Meeting, BASL 2011 London United Kingdom. Conference Publication: (var pagings) 2011; 60(pp A31-A32): September | Cross-sectional study       | 661             | PWID             | Drug treatment services        | 661                                 | HCV                           | 100      | 28.1 anti-HCV-positive         | Yes (if patient returned for result)              |

| Country        | Reference                                                                                                                                                                                                                        | Study design               | Sample size (N) | Study population                   | Study setting                   | Number of study participants tested | Disease test sought to detect | % tested | Viral hepatitis prevalence (%) | Were study participants informed of test results? |
|----------------|----------------------------------------------------------------------------------------------------------------------------------------------------------------------------------------------------------------------------------|----------------------------|-----------------|------------------------------------|---------------------------------|-------------------------------------|-------------------------------|----------|--------------------------------|---------------------------------------------------|
| United Kingdom | 42. Tait JM et al. <b>Dry blood spot testing for hepatitis C in people who injected drugs: Reaching the populations other tests cannot reach.</b> <i>Journal of Hepatology</i> 2013, 58: S63-S227.                               | Prospective cohort study   | 946             | PWID                               | Drug treatment services         | 946                                 | HCV                           | 100      | 31.2 anti-HCV-positive         | Yes (if patient returned for result)              |
| Netherlands    | 43. Van den Berg CH et al. <b>Never injected, but hepatitis C virus-infected: a study among self-declared never-injecting drug users from the Amsterdam Cohort Studies.</b> <i>Journal of Viral Hepatitis</i> 2009, 16: 568-577. | Retrospective cohort study | 364             | People who use non-injecting drugs | Public Health Service Amsterdam | 352                                 | HCV                           | 96.7     | 6.3 anti-HCV-positive          | NA                                                |

| Country     | Reference                                                                                                                                                                                      | Study design               | Sample size (N) | Study population                                   | Study setting                   | Number of study participants tested | Disease test sought to detect | % tested | Viral hepatitis prevalence (%)                                         | Were study participants informed of test results? |
|-------------|------------------------------------------------------------------------------------------------------------------------------------------------------------------------------------------------|----------------------------|-----------------|----------------------------------------------------|---------------------------------|-------------------------------------|-------------------------------|----------|------------------------------------------------------------------------|---------------------------------------------------|
| Netherlands | 44. van Houdt R et al. <b>Unexpectedly high proportion of drug users and men having sex with men who develop chronic hepatitis B infection.</b> <i>Journal of Hepatology</i> 2012, 57:529-533. | Retrospective cohort study | 1268            | People who use drugs                               | Public Health Service Amsterdam | 1268                                | HBV                           | 100      | 6.0 HBsAg-positive<br>52.9 anti-HBc-positive<br>64.0 anti-HCV-positive | No                                                |
| Switzerland | 45. Witteck A et al. <b>Management of hepatitis C virus (HCV) infection in drug substitution programs.</b> <i>Swiss Medical Weekly</i> 2011, 141: w13193.                                      | Cross-sectional study      | 398             | People who use drugs (injecting and non-injecting) | Drug substitution programmes    | 394                                 | HCV                           | 99.0     | 76.7 anti-HCV-positive<br>44.4 HCV-RNA-positive                        | Yes                                               |

| Country                                 | Reference                                                                                                                                                                                                                                                                                              | Study design          | Sample size (N) | Study population                     | Study setting          | Number of study participants tested | Disease test sought to detect | % tested | Viral hepatitis prevalence (%) | Were study participants informed of test results? |
|-----------------------------------------|--------------------------------------------------------------------------------------------------------------------------------------------------------------------------------------------------------------------------------------------------------------------------------------------------------|-----------------------|-----------------|--------------------------------------|------------------------|-------------------------------------|-------------------------------|----------|--------------------------------|---------------------------------------------------|
| <b>Health care patients<sup>3</sup></b> |                                                                                                                                                                                                                                                                                                        |                       |                 |                                      |                        |                                     |                               |          |                                |                                                   |
| France                                  | 46. Ansemant T et al.<br><b>Usefulness of routine hepatitis C and hepatitis B serology in the diagnosis of recent-onset arthritis. Systmatic prospective screening in all patients seen by the rheumatologists of a defined area - Brief report.</b><br><i>Joint Bone Spine</i> , 2012, 2012: 268-270. | Cross-sectional study | 233             | Patients with recent-onset arthritis | Rheumatology practices | 233                                 | HCV                           | 100      | 0.4 anti-HCV-positive          | Yes                                               |

<sup>3</sup> Excluding people living with HIV and people tested for reasons relating to pregnancy or use of assisted reproductive technology.

| Country        | Reference                                                                                                                                                                                                                                         | Study design             | Sample size (N) | Study population                                                 | Study setting        | Number of study participants tested | Disease test sought to detect | % tested | Viral hepatitis prevalence (%)                                                                                                      | Were study participants informed of test results? |
|----------------|---------------------------------------------------------------------------------------------------------------------------------------------------------------------------------------------------------------------------------------------------|--------------------------|-----------------|------------------------------------------------------------------|----------------------|-------------------------------------|-------------------------------|----------|-------------------------------------------------------------------------------------------------------------------------------------|---------------------------------------------------|
| United Kingdom | 47. Arnold DT et al. <b>Should patients with abnormal liver function tests in primary care be tested for chronic viral hepatitis: cost minimisation analysis based on a comprehensively tested cohort.</b> <i>BMC Family Practice</i> 2011, 12:9. | Prospective cohort study | 1236            | Patients with abnormal liver function test results               | Primary care clinics | 1236                                | HBV, HCV                      | 100      | 0.7 HBsAg-positive<br>0.3 anti-HCV-positive                                                                                         | NA                                                |
| Spain          | 48. Barril G et al. <b>Occult hepatitis C virus infection among hemodialysis patients.</b> <i>Journal of the American Society of Nephrology</i> 2008, 19: 2288-2292.                                                                              | Cross-sectional study    | 109             | Haemodialysis patients with abnormal liver function test results | Haemodialysis unit   | 109                                 | HCV                           | 100      | 45.0 HCV-RNA-positive in peripheral blood mononuclear cells<br><br>(all patients were anti-HCV-negative and serum HCV-RNA-negative) | NA                                                |

| Country   | Reference                                                                                                                                                                                                                                           | Study design          | Sample size (N) | Study population                                    | Study setting       | Number of study participants tested | Disease test sought to detect | % tested | Viral hepatitis prevalence (%)                                                                                          | Were study participants informed of test results? |
|-----------|-----------------------------------------------------------------------------------------------------------------------------------------------------------------------------------------------------------------------------------------------------|-----------------------|-----------------|-----------------------------------------------------|---------------------|-------------------------------------|-------------------------------|----------|-------------------------------------------------------------------------------------------------------------------------|---------------------------------------------------|
| Macedonia | 49. Bosevska G et al. <b>Screening for hepatitis B, C and HIV infection among patients on haemodialysis (cross sectional analysis among patients from two dialysis units in the period January to July 2005).</b> <i>Prilozi</i> 2009, 30: 159-174. | Cross-sectional study | 178             | Haemodialysis patients with end-stage renal disease | Haemodialysis units | 178                                 | HBV, HCV                      | 100      | 1.7 HBsAg-positive<br>3.9 anti-HBs-positive<br>7.3 anti-HBc-positive<br>31.5 anti-HCV-positive<br>21.4 HCV-RNA-positive | Yes                                               |

| Country | Reference                                                                                                                                                                                                                                                                                                                                | Study design             | Sample size (N) | Study population                         | Study setting                              | Number of study participants tested | Disease test sought to detect | % tested | Viral hepatitis prevalence (%)                                       | Were study participants informed of test results? |
|---------|------------------------------------------------------------------------------------------------------------------------------------------------------------------------------------------------------------------------------------------------------------------------------------------------------------------------------------------|--------------------------|-----------------|------------------------------------------|--------------------------------------------|-------------------------------------|-------------------------------|----------|----------------------------------------------------------------------|---------------------------------------------------|
| Spain   | 50. Cano J et al. <b>Screening for Hepatitis B Virus in a Department of Clinical Oncology in Spain.</b><br>European Journal of Cancer Conference: 2011 European Multidisciplinary Cancer Congress Stockholm Sweden Conference Start: 0110923 onference End: 20110927 Conference Publication: (var pagings) 2011; 47 (pp S250): September | Cross-sectional study    | 128             | Patients with solid tumours              | Hospital oncology department               | 128                                 | HBV                           | 100      | 3.9 anti-HBc-positive                                                | NA                                                |
| France  | 51. Chevaux JB et al. <b>Prevalence of hepatitis B and C and risk factors for nonvaccination in inflammatory bowel disease patients in Northeastern France.</b><br><i>Inflammatory Bowel Disease</i> , 2010, 16.                                                                                                                         | Prospective cohort study | 315             | Patients with inflammatory bowel disease | Hospital hepatogastroenterology department | 315                                 | HBV, HCV                      | 100      | 1.0 HBsAg-positive<br>2.5 anti-HBc-positive<br>1.0 anti-HCV-positive | NA                                                |



| Country | Reference                                                                                                                                                                                                           | Study design          | Sample size (N) | Study population                                                  | Study setting                              | Number of study participants tested | Disease test sought to detect | % tested | Viral hepatitis prevalence (%)                | Were study participants informed of test results? |
|---------|---------------------------------------------------------------------------------------------------------------------------------------------------------------------------------------------------------------------|-----------------------|-----------------|-------------------------------------------------------------------|--------------------------------------------|-------------------------------------|-------------------------------|----------|-----------------------------------------------|---------------------------------------------------|
| Poland  | 52. Flisiak R et al.<br><b>Prevalence and risk factors of HCV infection in Poland.</b><br><i>European Journal of Gastroenterology and Hepatology</i> 2011, 23: 1213-1217.                                           | Cross-sectional study | 8901            | Patients in various inpatient and outpatient health care settings | Hospitals and outpatient clinics           | 8901                                | HCV                           | 100      | 1.9 anti-HCV-positive<br>0.8 HCV-RNA-positive | NA                                                |
| Poland  | 53. Ganczak M et al.<br><b>Infections with HBV, HCV and HIV in patients admitted to the neurosurgical department of a teaching hospital.</b><br><i>Neurologia i Neurochirurgia Polska</i> 2008, 42:231-237.         | Cross-sectional study | 100             | Neurosurgical patients                                            | Hospital neurosurgical ward                | 100                                 | HBV, HCV                      | 100      | 2.0 HBsAg-positive<br>2.0 anti-HCV-positive   | No (testing was anonymous)                        |
| Poland  | 54. Ganczak M et al.<br><b>Seroprevalence of hepatitis C virus infection among surgical nurses, their patients and blood donation candidates in Poland.</b> <i>Journal of Hospital Infection</i> 2012, 82: 266-270. | Cross-sectional study | 1118            | Female patients in surgical and gynaecological wards              | Hospital surgical and gynaecological wards | 1118                                | HCV                           | 100      | 1.1 anti-HCV-positive                         | Yes                                               |

| Country | Reference                                                                                                                                                                                                        | Study design               | Sample size (N) | Study population                         | Study setting                       | Number of study participants tested | Disease test sought to detect | % tested               | Viral hepatitis prevalence (%)              | Were study participants informed of test results? |
|---------|------------------------------------------------------------------------------------------------------------------------------------------------------------------------------------------------------------------|----------------------------|-----------------|------------------------------------------|-------------------------------------|-------------------------------------|-------------------------------|------------------------|---------------------------------------------|---------------------------------------------------|
| France  | 55. Guennoc X et al. <b>Is screening for hepatitis B and hepatitis C useful in patients with recent-onset polyarthritis? The ESPOIR cohort study.</b> <i>The Journal of Rheumatology</i> 2009; 36 (7): 1407-1413 | Prospective cohort study   | 813             | Patients with recent-onset polyarthritis | Hospitals                           | 808                                 | HBV, HCV                      | 99.3                   | 0.1 HBsAg-positive<br>0.9 anti-HCV-positive | NA                                                |
| Italy   | 56. Ippolito AM et al. <b>Unawareness of HBV infection among inpatients in a Southern Italian hospital.</b> <i>Journal of Viral Hepatitis</i> 2011, 18:e206-e211.                                                | Cross-sectional study      | 25              | Hospital inpatients                      | Hospital inpatient wards            | 25                                  | HBV                           | 100                    | 1.2 HBsAg-positive                          | Yes                                               |
| Greece  | 57. Kakisi OK et al. <b>Prevalence of hepatitis B, hepatitis C, and HIV infections among patients in a psychiatric hospital in Greece.</b> <i>Psychiatric Services</i> 2009, 60: 1269-1272.                      | Retrospective cohort study | 805             | Psychiatric hospital inpatients          | Psychiatric hospital inpatient ward | HBV: 803<br>HCV: 793                | HBV, HCV                      | HBV: 99.8<br>HCV: 98.5 | 2.0 HBsAg-positive<br>9.0 anti-HCV-positive | NA                                                |

| Country        | Reference                                                                                                                                                                                    | Study design          | Sample size (N)        | Study population                                | Study setting                           | Number of study participants tested | Disease test sought to detect | % tested               | Viral hepatitis prevalence (%) | Were study participants informed of test results? |
|----------------|----------------------------------------------------------------------------------------------------------------------------------------------------------------------------------------------|-----------------------|------------------------|-------------------------------------------------|-----------------------------------------|-------------------------------------|-------------------------------|------------------------|--------------------------------|---------------------------------------------------|
| Spain          | 58. Marcos M et al. <b>Chronic hepatitis B virus infection in Sjögren's syndrome.</b> Prevalence and clinical significance in 603 patients. <i>Autoimmunity Reviews</i> 2009, 8: 616-620.    | Cross-sectional study | 603                    | Patients with Sjogren syndrome                  | Hospital autoimmune diseases department | 603                                 | HBV                           | 100                    | 0.8 HBsAg-positive             | NA                                                |
| United Kingdom | 59. McClean H et al. <b>National audit of asymptomatic screening in UK genitourinary medicine clinics: case-notes audit.</b> <i>International Journal of STD and AIDS</i> 2010, 21: 506-511. | Cross-sectional study | HBV: 4297<br>HCV: 4420 | Patients seen in genitourinary medicine clinics | Genitourinary medicine clinics          | HBV: 1122<br>HCV: 566               | HBV, HCV                      | HBV: 25.7<br>HCV: 13.0 | NA                             | NA                                                |

| Country | Reference                                                                                                                                                                                                                                                                                                                                                              | Study design          | Sample size (N) | Study population                            | Study setting                 | Number of study participants tested | Disease test sought to detect | % tested | Viral hepatitis prevalence (%)                                       | Were study participants informed of test results? |
|---------|------------------------------------------------------------------------------------------------------------------------------------------------------------------------------------------------------------------------------------------------------------------------------------------------------------------------------------------------------------------------|-----------------------|-----------------|---------------------------------------------|-------------------------------|-------------------------------------|-------------------------------|----------|----------------------------------------------------------------------|---------------------------------------------------|
| Germany | 60. Muche M et al. <b>Prevalence and risk factors for hepatitis B and C among patients attending a german emergency department - Is a risk assessment questionnaire a useful pre-screening tool?</b> <i>Journal of Hepatology Conference: 48th Annual Meeting of the European Association for the Study of the Liver, International Liver Congress 2013 Amsterdam.</i> | Cross-sectional study | 1942            | Hospital emergency department patients      | Hospital emergency department | 1942                                | HBV, HCV                      | 100      | 0.5 HbsAg-positive<br>9.9 anti-HBc-positive<br>1.6 anti-HCV-positive | NA                                                |
| Turkey  | 61. Okan V et al. <b>Prevalence of hepatitis B and C viruses in patients with lymphoproliferative disorders.</b> <i>International Journal of Hematology</i> 2008, 88: 403-408.                                                                                                                                                                                         | Cross-sectional study | 1014            | Patients with lymphoproliferative disorders | Haematology clinic            | 334                                 | HBV, HCV                      | 100      | 6.2 HbsAg-positive<br>2.7 anti-HCV-positive                          | NA                                                |

| Country | Reference                                                                                                                                                                     | Study design               | Sample size (N) | Study population                                                            | Study setting                  | Number of study participants tested | Disease test sought to detect | % tested | Viral hepatitis prevalence (%) | Were study participants informed of test results? |
|---------|-------------------------------------------------------------------------------------------------------------------------------------------------------------------------------|----------------------------|-----------------|-----------------------------------------------------------------------------|--------------------------------|-------------------------------------|-------------------------------|----------|--------------------------------|---------------------------------------------------|
| Turkey  | 62. Ozaslan E et al. <b>Occult hepatitis B virus infection in Turkish healthy individuals.</b> <i>European Journal of Gastroenterology and Hepatology</i> 2009, 21:1436-1440. | Prospective cohort study   | 347             | Patients presenting for nonspecific complaints or routine medical check-ups | Not specified                  | 347                                 | HBV                           | 100      | NA                             | NA                                                |
| Italy   | 63. Palazzi C. <b>Hepatitis C virus infection in Italian patients with fibromyalgia.</b> <i>Clinical Rheumatology</i> 2008, 27: 101-103.                                      | Cross-sectional study      | 152             | Patients with fibromyalgia                                                  | Rheumatology outpatient clinic | 152                                 | HCV                           | 100      | 4.6 anti-HCV-positive          | NA                                                |
| Germany | 64. Ross RS et al. <b>Transmission of hepatitis C virus in an orthopedic hospital ward.</b> <i>Journal of Medical Virology</i> 2009, 81: 249-257.                             | Retrospective cohort study | 135             | Patients in a hospital orthopaedic ward                                     | Hospital orthopaedic ward      | 122                                 | HCV                           | 90.4     | 4.4 HCV-RNA-positive           | Yes                                               |

| Country     | Reference                                                                                                                                                                                                           | Study design          | Sample size (N) | Study population                                                  | Study setting                     | Number of study participants tested | Disease test sought to detect | % tested | Viral hepatitis prevalence (%) | Were study participants informed of test results? |
|-------------|---------------------------------------------------------------------------------------------------------------------------------------------------------------------------------------------------------------------|-----------------------|-----------------|-------------------------------------------------------------------|-----------------------------------|-------------------------------------|-------------------------------|----------|--------------------------------|---------------------------------------------------|
| Sweden      | 65. Sjöberg K et al.<br><b>Prevalence of hepatitis C in Swedish diabetics is low and comparable to that in health care workers.</b><br><i>European Journal of Gastroenterology and Hepatology</i> 2008, 20:135-138. | Cross-sectional study | 874             | Patients with diabetes                                            | Hospital endocrinology department | 874                                 | HCV                           | 100      | 0.7 anti-HCV-positive          | NA                                                |
| Netherlands | 66. Slavenburg S et al.<br><b>Prevalence of hepatitis C in the general population in the Netherlands.</b> <i>The Netherlands Journal of Medicine</i> 2008, 66: 13-17.                                               | Cross-sectional study | 2200            | People who visited general practices in urban eastern Netherlands | General practices                 | 2200                                | HCV                           | 100      | 0.7 anti-HCV-positive          | No                                                |
| France      | 67. Spenatto N et al.<br><b>Hepatitis B screening: Who to target? A French sexually transmitted infection clinic experience.</b><br><i>Journal of Hepatology</i> 2013, 58: 690-697.                                 | Cross-sectional study | 7692            | Asymptomatic people seeking STI screening                         | STI clinic                        | 6194                                | HBV                           | 80.5     | 0.8 HBsAg-positive             | Yes                                               |

| Country        | Reference                                                                                                                                                                                                        | Study design                | Sample size (N) | Study population                                     | Study setting                                         | Number of study participants tested | Disease test sought to detect | % tested | Viral hepatitis prevalence (%) | Were study participants informed of test results? |
|----------------|------------------------------------------------------------------------------------------------------------------------------------------------------------------------------------------------------------------|-----------------------------|-----------------|------------------------------------------------------|-------------------------------------------------------|-------------------------------------|-------------------------------|----------|--------------------------------|---------------------------------------------------|
| United Kingdom | 68. Tweed E et al. <b>Hepatitis C testing in sexual health services in England, 2002e7: results from sentinel surveillance.</b> <i>Sexually Transmitted Infections</i> 2010, 86: 126-130.                        | Retro-spective cohort study | 90,424          | Patients seeking sexual health services              | Sexual health clinic                                  | 90,424                              | HCV                           | 100      | 3.2 anti-HCV-positive          | NA                                                |
| Germany        | 69. Vermehren J et al. <b>High prevalence of anti-HCV antibodies in two metropolitan emergency departments in Germany: a prospective screening analysis of 28,809 patients.</b> <i>PLoS One</i> 2012, 7: e41206. | Retro-spective cohort study | 28,809          | Hospital emergency department patients               | Hospital emergency departments                        | 28,809                              | HCV                           | 100      | 2.6 anti-HCV-positive          | Yes                                               |
| Sweden         | 70. Ydreborg M et al. <b>Look-back screening for the identification of transfusion-induced hepatitis C virus infection in Sweden.</b> <i>Scandinavian Journal of Infectious Diseases</i> 2011, 43: 522-527.      | Cross-sectional study       | 13,573          | People who received blood transfusions prior to 1992 | None (serological samples obtained from laboratories) | 13,573                              | HCV                           | 100      | 0.9 anti-HCV-positive          | NA                                                |

| Country                         | Reference                                                                                                                                                                                   | Study design          | Sample size (N) | Study population   | Study setting | Number of study participants tested | Disease test sought to detect | % tested | Viral hepatitis prevalence (%) | Were study participants informed of test results? |
|---------------------------------|---------------------------------------------------------------------------------------------------------------------------------------------------------------------------------------------|-----------------------|-----------------|--------------------|---------------|-------------------------------------|-------------------------------|----------|--------------------------------|---------------------------------------------------|
| <b><i>Other populations</i></b> |                                                                                                                                                                                             |                       |                 |                    |               |                                     |                               |          |                                |                                                   |
| <b>United Kingdom</b>           | 71. Balogun MA et al. <b>Hepatitis B virus transmission in pre-adolescent schoolchildren in four multi-ethnic areas of England.</b> <i>Epidemiology &amp; Infection</i> 2013, 141: 916-925. | Cross-sectional study | 5661            | Children aged 7-11 | NA            | 5334                                | HBV                           | 94.2     | 0.26 anti-HBc-positive         | NA                                                |



| Country        | Reference                                                                                                                                                                     | Study design          | Sample size (N)     | Study population   | Study setting | Number of study participants tested | Disease test sought to detect | % tested | Viral hepatitis prevalence (%)                                        | Were study participants informed of test results? |
|----------------|-------------------------------------------------------------------------------------------------------------------------------------------------------------------------------|-----------------------|---------------------|--------------------|---------------|-------------------------------------|-------------------------------|----------|-----------------------------------------------------------------------|---------------------------------------------------|
| United Kingdom | 72. Brown AE et al. <b>Prevalence of markers for HIV, hepatitis B and hepatitis C infection in UK military recruits.</b> <i>Epidemiology and Infection</i> 2011, 139: August. | Cross-sectional study | 14,759              | Military recruits  | NA            | 14,663                              | HBV, HCV                      | 99.3     | 0.4 HBsAg-positive<br>3.6 anti-HBc-positive<br>0.06 anti-HCV-positive | No (testing was anonymous)                        |
| Germany        | 73. Cai W et al. <b>Hepatitis B infections among children and adolescents in Germany.</b> <i>The Pediatric Infectious Disease Journal</i> 2011, 30.                           | Cross-sectional study | 14,747 <sup>4</sup> | Children aged 3–17 | NA            | 13,065                              | HBV                           | 88.6     | 0.5 anti-HBc-positive                                                 | NA                                                |

---

<sup>4</sup> Approximation.

| Country        | Reference                                                                                                                                                                  | Study design          | Sample size (N) | Study population                                                            | Study setting        | Number of study participants tested | Disease test sought to detect | % tested | Viral hepatitis prevalence (%)                                                 | Were study participants informed of test results? |
|----------------|----------------------------------------------------------------------------------------------------------------------------------------------------------------------------|-----------------------|-----------------|-----------------------------------------------------------------------------|----------------------|-------------------------------------|-------------------------------|----------|--------------------------------------------------------------------------------|---------------------------------------------------|
| Spain          | 74. Castillo I et al. <b>Hepatitis C virus infection in the family setting of patients with occult hepatitis C</b> <i>Journal of Medical Virology</i> 2009, 81: 1198-1203. | Cross-sectional study | 218             | Family members of people with occult HCV infection or chronic HCV infection | NA                   | 218                                 | HCV                           | 100      | 6.4 anti-HCV-positive<br>4.1 HCV-RNA-positive                                  | NA                                                |
| United Kingdom | 75. Coyne KM et al. <b>Sexual health of adults working in pornographic films.</b> <i>International Journal of STD and AIDS</i> 2009, 20: 508-509.                          | Cross-sectional study | 115             | Adult film industry actors                                                  | Sexual health clinic | 115                                 | HBV, HCV                      | 100      | 0 HBV-positive (marker not specified)<br>0 HCV-positive (marker not specified) | NA                                                |

| Country     | Reference                                                                                                                                                                                                                                                                                                                                                                                                                        | Study design                         | Sample size (N) | Study population                                  | Study setting | Number of study participants tested | Disease test sought to detect | % tested | Viral hepatitis prevalence (%) | Were study participants informed of test results? |
|-------------|----------------------------------------------------------------------------------------------------------------------------------------------------------------------------------------------------------------------------------------------------------------------------------------------------------------------------------------------------------------------------------------------------------------------------------|--------------------------------------|-----------------|---------------------------------------------------|---------------|-------------------------------------|-------------------------------|----------|--------------------------------|---------------------------------------------------|
| Netherlands | 76. Cuyppers WJ et al. <b>High prevalence of HIV, other sexually transmitted infections and risk profile in male commercial sex workers who have sex with men in the Netherlands.</b><br>Sexually Transmitted Infections Conference: 19th Biennial Conference of the International Society for Sexually Transmitted Diseases Research Quebec City, QC Canada 2011. Conference Publication: /var pagings 011; 87 (pp A127): July. | Retro-spective cross-sectional study | 99              | Male commercial sex workers who have sex with men | Not specified | 99                                  | HBV                           | 100      | 8.1 HBsAg-positive             | NA                                                |

| Country        | Reference                                                                                                                                                                                                                                                                                                 | Study design                        | Sample size (N)                                                     | Study population                                       | Study setting                       | Number of study participants tested        | Disease test sought to detect | % tested                                     | Viral hepatitis prevalence (%)                                      | Were study participants informed of test results? |
|----------------|-----------------------------------------------------------------------------------------------------------------------------------------------------------------------------------------------------------------------------------------------------------------------------------------------------------|-------------------------------------|---------------------------------------------------------------------|--------------------------------------------------------|-------------------------------------|--------------------------------------------|-------------------------------|----------------------------------------------|---------------------------------------------------------------------|---------------------------------------------------|
| United Kingdom | 77. Hickman M et al. <b>Increasing the uptake of hepatitis C virus testing among injecting drug users in specialist drug treatment and prison settings by using dried blood spots for diagnostic testing: a cluster randomized controlled trial.</b> <i>Journal of Viral Hepatitis</i> 2008, 15: 250-254. | Cluster-randomised controlled trial | Intervention arm: 6550<br>Control arm: 5800                         | Drug users and male prison inmates (not disaggregated) | Drug treatment services and prisons | Intervention arm: 1174<br>Control arm: 535 | HCV                           | Intervention arm: 17.9%<br>Control arm: 9.2% | 31.0 anti-HCV-positive (intervention and control patients combined) | NA                                                |
| Turkey         | 78. Karaosmanoglu HK et al. <b>Seroprevalence of hepatitis B: do blood donors represent the general population?</b> <i>Journal of Infection in Developing Countries</i> 2012, 6:181-183.                                                                                                                  | Retro-spective cohort study         | 10,903 (9,949 blood donors, 954 pre-marital screening participants) | Healthy individuals undergoing premarital screening    | NA                                  | 954                                        | HBV                           | 100                                          | 3.4 HBsAg-positive                                                  | NA                                                |

| Country | Reference                                                                                                                                                                                                                                | Study design             | Sample size (N) | Study population                                     | Study setting | Number of study participants tested | Disease test sought to detect | % tested | Viral hepatitis prevalence (%)                 | Were study participants informed of test results? |
|---------|------------------------------------------------------------------------------------------------------------------------------------------------------------------------------------------------------------------------------------------|--------------------------|-----------------|------------------------------------------------------|---------------|-------------------------------------|-------------------------------|----------|------------------------------------------------|---------------------------------------------------|
| Albania | 79. Katsanos KH et al. <b>Hepatitis B remains a major health priority in Western Balkans: Results of a 4-year prospective Greek–Albanian collaborative study.</b> <i>European Journal of Internal Medicine</i> 2009, 20: 698-702.        | Prospective cohort study | 410             | Albanians aged 14–20                                 | Not specified | 410                                 | HBV                           | 100      | 11.9 HBsAg-positive                            | NA                                                |
| France  | 80. Meffre C. <b>Prevalence of hepatitis B and hepatitis C virus infections in France in 2004: Social factors are important predictors after adjusting for known risk factors.</b> <i>Journal of Medical Virology</i> 2010, 82: 546-555. | Cross-sectional study    | 14,416          | French metropolitan residents aged 18–80             | NA            | 14,416                              | HBV, HCV                      | 100      | 7.3 anti-HBc-positive<br>0.8 anti-HCV-positive | NA                                                |
| Poland  | 81. Pazdiora P et al. <b>Screening family and sexual contacts of HBsAg+ persons in the Pilsen region.</b> <i>Epidemiology, Mikrobiology, Immunology</i> 2012, 61: 51-57.                                                                 | Cross-sectional study    | 1017            | Family and sexual contacts of HBsAg-positive persons | NA            | 908                                 | HBV                           | 89.3     | 18.0 HBC-positive (marker not specified)       | NA                                                |

| Country | Reference                                                                                                                                           | Study design          | Sample size (N) | Study population                                                                                     | Study setting                                                          | Number of study participants tested | Disease test sought to detect | % tested | Viral hepatitis prevalence (%)                | Were study participants informed of test results? |
|---------|-----------------------------------------------------------------------------------------------------------------------------------------------------|-----------------------|-----------------|------------------------------------------------------------------------------------------------------|------------------------------------------------------------------------|-------------------------------------|-------------------------------|----------|-----------------------------------------------|---------------------------------------------------|
| Albania | 82. Resuli B et al.<br><b>Epidemiology of hepatitis B virus infection in Albania.</b><br><i>World Journal of Gastroenterology</i> 2009, 15:849-852. | Cross-sectional study | 1576            | Heterogeneous study sample included high school students, university students and military personnel | High schools; universities; military facilities; blood donation centre | 1576                                | HBV                           | 100      | 10.2 HBsAg-positive<br>29.1 anti-HBs-positive | NA                                                |

| Country | Reference                                                                                                                                                                          | Study design                | Sample size (N)                                            | Study population               | Study setting     | Number of study participants tested                       | Disease test sought to detect | % tested                                                     | Viral hepatitis prevalence (%)                                                                                                                                                   | Were study participants informed of test results? |
|---------|------------------------------------------------------------------------------------------------------------------------------------------------------------------------------------|-----------------------------|------------------------------------------------------------|--------------------------------|-------------------|-----------------------------------------------------------|-------------------------------|--------------------------------------------------------------|----------------------------------------------------------------------------------------------------------------------------------------------------------------------------------|---------------------------------------------------|
| France  | 83. Sahajian F et al. <b>A randomized trial of viral hepatitis prevention among underprivileged people in the Lyon area of France.</b> Journal of Public Health 2011, 33: 182-192. | Randomised controlled trial | Intervention 1: 222<br>Intervention 2: 243<br>Control: 811 | Residents of homeless shelters | Homeless shelters | Intervention 1: 161<br>Intervention 2: 188<br>Control: 30 | HBV, HCV                      | Intervention 1: 72.5<br>Intervention 2: 77.4<br>Control: 3.7 | Intervention 1: 2.1 HBsAg-positive; 3.2 anti-HCV-positive<br><br>Intervention 2: 4.8 HBsAg-positive, 2.8 anti-HCV-positive<br><br>Control: 0 HBsAg-positive, 0 anti-HCV-positive | NA                                                |

| Country        | Reference                                                                                                                                                                                                                                                                                         | Study design          | Sample size (N) | Study population         | Study setting                             | Number of study participants tested | Disease test sought to detect | % tested | Viral hepatitis prevalence (%)                                        | Were study participants informed of test results? |
|----------------|---------------------------------------------------------------------------------------------------------------------------------------------------------------------------------------------------------------------------------------------------------------------------------------------------|-----------------------|-----------------|--------------------------|-------------------------------------------|-------------------------------------|-------------------------------|----------|-----------------------------------------------------------------------|---------------------------------------------------|
| Greece         | 84. Stamouli M et al. <b>Prevalence of Hepatitis B among Greek Naval Recruits.</b> Clinical Chemistry and Laboratory Medicine Conference: Congress of the Swiss Union of Laboratory Medicine, SULM - Swiss MedLab 2012 Berne Switzerland Conference Publication: (var pagings) 2012; 50 (5): May. | Cross-sectional study | 1000            | Military recruits        | NA                                        | 1000                                | HBV                           | 100      | 0.1 HBsAg-positive<br>74.5 anti-HBs-positive<br>0.9 anti-HBc-positive | NA                                                |
| United Kingdom | 85. Taylor A et al. <b>Prevalence and determinants of hepatitis C virus infection among female drug injecting sex workers in Glasgow.</b> <i>Harm Reduction Journal</i> 2008, 5.                                                                                                                  | Cross-sectional study | 114             | Street-based sex workers | Health and social services drop-in centre | 103                                 | HCV                           | 90.4     | 64.3 anti-HCV-positive                                                | No (testing was anonymous)                        |



| Country            | Reference                                                                                                                                                                                                            | Study design          | Sample size (N) | Study population                                                            | Study setting                                                           | Number of study participants tested | Disease test sought to detect | % tested | Viral hepatitis prevalence (%)                 | Were study participants informed of test results? |
|--------------------|----------------------------------------------------------------------------------------------------------------------------------------------------------------------------------------------------------------------|-----------------------|-----------------|-----------------------------------------------------------------------------|-------------------------------------------------------------------------|-------------------------------------|-------------------------------|----------|------------------------------------------------|---------------------------------------------------|
| <b>Hungary</b>     | 86. Tresó B et al. <b>Prevalence and Correlates of HCV, HVB, and HIV infection among prison inmates and staff, Hungary.</b> <i>Journal of Urban Health</i> 2012, 89: 108-116.                                        | Cross-sectional study | 1066            | Prison staff                                                                | Prisons                                                                 | 1066                                | HBV, HCV                      | 100      | 0.4 HBsAg-positive<br>0.5 anti-HCV-positive    | NA                                                |
| <b>Italy</b>       | 87. Trevisan A et al. <b>Prevalence of Markers for Hepatitis B Virus and Vaccination Compliance Among Medical School Students in Italy.</b> <i>Infection control and hospital epidemiology</i> 2008, 29 : 1189-1191. | Cross-sectional study | 2361            | Students attending graduate courses at a university medical school          | University medical school                                               | 2361                                | HBV                           | 100      | NA                                             | Yes                                               |
| <b>Netherlands</b> | 88. Urbanus AT et al. <b>People with multiple tattoos and/or piercings are not at increased risk for HBV or HCV in the Netherlands.</b> <i>Plos One</i> 2011, 6 : e24736.                                            | Cross-sectional study | 434             | Tattoo artists, piercers, and people with multiple tattoos and/or piercings | tattoo conventions; tattoo and/or piercing shops; STI outpatient clinic | 434                                 | HBV, HCV                      | 100      | 4.2 anti-HBc-positive<br>0.2 anti-HCV-positive | NA                                                |

| Country     | Reference                                                                                                                                                                                                                     | Study design          | Sample size (N) | Study population                                                                                                                           | Study setting     | Number of study participants tested | Disease test sought to detect | % tested | Viral hepatitis prevalence (%)                                                       | Were study participants informed of test results?          |
|-------------|-------------------------------------------------------------------------------------------------------------------------------------------------------------------------------------------------------------------------------|-----------------------|-----------------|--------------------------------------------------------------------------------------------------------------------------------------------|-------------------|-------------------------------------|-------------------------------|----------|--------------------------------------------------------------------------------------|------------------------------------------------------------|
| Germany     | 89. Walz A et al. <b>Vertical transmission of HBV virus (HBV) from mothers negative for HBV surface antigen and positive for antibody to HBV core antigen.</b> <i>The Journal of Infectious Diseases</i> 2009, 200:1227-1231. | Cross-sectional study | 105             | Children of women who are HBsAg-positive and anti-HBc-positive                                                                             | Maternity clinics | 105                                 | HBV                           | 100      | 1.9<br>HBsAg-positive<br><br>3.8<br>anti-HBc-positive<br><br>4.8<br>HBV-DNA-positive | Yes                                                        |
| Netherlands | 90. Zuure FR et al. <b>Using mass media and the internet as tools to diagnose hepatitis C infections in the general population.</b> <i>American Journal of Preventive Medicine</i> 2011 40: 345-352.                          | Cross-sectional study | 1480            | Self-identified as belonging to one of several groups at risk for HCV (e.g. blood transfusion prior to 1992, HCV-endemic country of birth) | NA                | 420                                 | HCV                           | 28.4     | 3.6<br>anti-HCV-positive                                                             | Yes, but informed online so would need to check themselves |

| Country                                                                                                  | Reference                                                                                                                                                                                                          | Study design          | Sample size (N) | Study population           | Study setting        | Number of study participants tested | Disease test sought to detect | % tested | Viral hepatitis prevalence (%) | Were study participants informed of test results? |
|----------------------------------------------------------------------------------------------------------|--------------------------------------------------------------------------------------------------------------------------------------------------------------------------------------------------------------------|-----------------------|-----------------|----------------------------|----------------------|-------------------------------------|-------------------------------|----------|--------------------------------|---------------------------------------------------|
| <b><i>People tested for reasons relating to pregnancy or use of assisted reproductive technology</i></b> |                                                                                                                                                                                                                    |                       |                 |                            |                      |                                     |                               |          |                                |                                                   |
| <b>Germany</b>                                                                                           | 91. Bissinger A.L et al. <b>Frequency of hepatitis B antigen positive pregnant women with high viral loads detected during routine antenatal care in Germany.</b> <i>Journal of Hepatology</i> 2013, 58:S229-S407. | Cross-sectional study | 41,942          | Pregnant women             | Hospitals            | 41,942                              | HBV                           | 100      | 0.6 HBsAg-positive             | NA                                                |
| <b>Norway</b>                                                                                            | 92. Bjerke S et al. <b>Infectious immune status in an obstetric population of Pakistani immigrants in Norway.</b> <i>Scandinavian Journal of Public Health</i> 2011, 39:464.                                       | Cross-sectional study | 206             | Pregnant women (immigrant) | Hospitals            | 206                                 | HBV                           | 100      | 11.0 anti-HBc-positive         | Yes                                               |
| <b>Switzerland</b>                                                                                       | 93. Frischknecht F et al. <b>Serological testing for infectious diseases in pregnant women: are the guidelines followed?</b> <i>Swiss Medical Weekly</i> 2011, 140: 13138.                                         | Cross-sectional study | 723             | Pregnant women             | Hospital labour ward | 703                                 | HBV                           | 97.2     | 0.7 anti-HBs-positive          | NA                                                |

| Country     | Reference                                                                                                                                                                                                     | Study design                | Sample size (N) | Study population | Study setting                | Number of study participants tested | Disease test sought to detect | % tested | Viral hepatitis prevalence (%)                 | Were study participants informed of test results? |
|-------------|---------------------------------------------------------------------------------------------------------------------------------------------------------------------------------------------------------------|-----------------------------|-----------------|------------------|------------------------------|-------------------------------------|-------------------------------|----------|------------------------------------------------|---------------------------------------------------|
| Turkey      | 94. Gun I et al. <b>Seroprevalence among Turkish pregnant women.</b> <i>HealthMED Journal</i> 2012, 6: 2012.                                                                                                  | Retro-spective cohort study | 1537            | Pregnant women   | Outpatient clinic            | 1537                                | HBV, HCV                      | 100      | 2.3 anti-HBs-positive<br>0.2 anti-HCV-positive | NA                                                |
| Denmark     | 95. Harder KM et al. <b>Universal screening for hepatitis B among pregnant women led to 96% vaccination coverage among newborns of HBsAg positive mothers in Denmark.</b> <i>Vaccine</i> 2011, 29: 9303-9307. | Prospective cohort study    | 142,739         | Pregnant women   | General practitioner clinics | 140,376                             | HBV                           | 98.3     | 0.3 HBsAg-positive                             | NA                                                |
| Switzerland | 96. Heininger U et al. <b>Evaluation of the compliance with recommended procedures in newborns exposed to HBsAg-positive mothers.</b> <i>The Pediatric Infectious Disease Journal</i> 2010, 29: 248-250.      | Retro-spective cohort study | 27,226          | Pregnant women   | Hospital maternity units     | 26,750                              | HBV                           | 96.6     | 0.7 HBsAg-positive                             | NA                                                |

| Country        | Reference                                                                                                                                                                                                                                                                                        | Study design                | Sample size (N)         | Study population                                         | Study setting                                                        | Number of study participants tested | Disease test sought to detect | % tested | Viral hepatitis prevalence (%)              | Were study participants informed of test results? |
|----------------|--------------------------------------------------------------------------------------------------------------------------------------------------------------------------------------------------------------------------------------------------------------------------------------------------|-----------------------------|-------------------------|----------------------------------------------------------|----------------------------------------------------------------------|-------------------------------------|-------------------------------|----------|---------------------------------------------|---------------------------------------------------|
| United Kingdom | 97. Hughes C et al. <b>Viral screening at the time of each donation in ART patients: is it justified?</b> <i>Human Reproduction</i> 2011, 26: November.                                                                                                                                          | Retro-spective cohort study | Not specified (>12,500) | Women and men utilising assisted reproductive technology | Tertiary hospital referral unit for assisted reproductive technology | HBV: 12,797<br>HCV: 12,762          | HBV, HCV                      | 100      | 0.3 HBsAg-positive<br>0.3 anti-HCV-positive | NA                                                |
| Greece         | 98. Karatapanis S et al. <b>Higher rates of chronic hepatitis B infection and low vaccination-induced protection rates among parturients escaping HBsAg prenatal testing in Greece: a 2-year prospective study.</b> <i>European Journal of Gastroenterology and Hepatology</i> 2012, 24:878–883. | Prospective cohort study    | 1000                    | Pregnant women                                           | Hospital obstetric/gynaecology department                            | 1000                                | HBV                           | 100      | 5.3 HBsAg-positive                          | Yes                                               |

| Country | Reference                                                                                                                                                                                       | Study design             | Sample size (N) | Study population                                     | Study setting                   | Number of study participants tested | Disease test sought to detect | % tested | Viral hepatitis prevalence (%)             | Were study participants informed of test results? |
|---------|-------------------------------------------------------------------------------------------------------------------------------------------------------------------------------------------------|--------------------------|-----------------|------------------------------------------------------|---------------------------------|-------------------------------------|-------------------------------|----------|--------------------------------------------|---------------------------------------------------|
| Germany | 99. Knorr B et al. <b>Prevalence of hepatitis B virus infection among women at reproductive age at a German university hospital.</b> <i>Journal of Clinical Virology</i> 2008, 42: 422-424.     | Cross-sectional study    | 5518            | Pregnant women and women planning to become pregnant | Hospital gynaecology department | 5518                                | HBV                           | 100      | 1.6 HBsAg-positive                         | NA                                                |
| Turkey  | 100. Koruk I et al. <b>An intervention study to improve HBsAg testing and preventive practices for hepatitis B in an obstetrics hospital.</b> <i>TAF Preventive Medicine Bulletin</i> 2011, 10. | Quasi-experimental study | 18,709          | Pregnant women                                       | Obstetric/ gynaecology hospital | 3078                                | HBV                           | 16.5     | 0.8 HBsAg-positive                         | Yes                                               |
| Norway  | 101. Kristiansen MG et al. <b>Prevalences of viremic hepatitis C and viremic hepatitis B in pregnant women in Northern Norway.</b> <i>Hepato-Gastroenterology</i> 2009, 56: 1141-1145.          | Cross-sectional study    | 1668            | Pregnant women                                       | Ultrasound units                | 1668                                | HBV, HCV                      | 100      | 0.1 HBsAg-positive<br>0.2 HCV-RNA-positive | Yes                                               |

| Country        | Reference                                                                                                                                                                                                           | Study design              | Sample size (N)        | Study population                                         | Study setting                                                   | Number of study participants tested | Disease test sought to detect | % tested | Viral hepatitis prevalence (%)              | Were study participants informed of test results? |
|----------------|---------------------------------------------------------------------------------------------------------------------------------------------------------------------------------------------------------------------|---------------------------|------------------------|----------------------------------------------------------|-----------------------------------------------------------------|-------------------------------------|-------------------------------|----------|---------------------------------------------|---------------------------------------------------|
| Ireland        | 102. Lambert J et al. <b>Universal antenatal screening for hepatitis C.</b> <i>Irish Medical Journal</i> 2013, 106: 136-139.                                                                                        | Prospective cohort study  | 8976                   | Pregnant women                                           | Hospital                                                        | 8976                                | HCV                           | 100      | 0.9 anti-HCV-positive                       | NA                                                |
| Netherlands    | 103. Op de Coul ELM et al. <b>Antenatal screening for HIV, hepatitis B and syphilis in the Netherlands is effective.</b> <i>BMC Infectious Diseases</i> 2011; 11.                                                   | Retropective cohort study | 190,141                | Pregnant women                                           | NA (national database of screening results from pregnant women) | 190,140                             | HBV                           | >99.99   | 0.3 HBsAg-positive                          | NA                                                |
| United Kingdom | 104. Pepas L et al. <b>Viral screening before each cycle of assisted conception treatment is expensive and unnecessary: a survey of results from UK inner city clinic.</b> <i>Human Fertility</i> 2011, 14:224-229. | Retropective cohort study | HBV: 3910<br>HCV: 3953 | Women and men utilising assisted reproductive technology | Hospital-assisted reproductive technology unit                  | HBV: 3910<br>HCV: 3953              | HBV, HCV                      | 100      | 1.7 HBsAg-positive<br>0.4 anti-HCV-positive | NA                                                |

| Country  | Reference                                                                                                                                                                                                                                         | Study design                | Sample size (N) | Study population                      | Study setting                 | Number of study participants tested | Disease test sought to detect | % tested | Viral hepatitis prevalence (%)               | Were study participants informed of test results? |
|----------|---------------------------------------------------------------------------------------------------------------------------------------------------------------------------------------------------------------------------------------------------|-----------------------------|-----------------|---------------------------------------|-------------------------------|-------------------------------------|-------------------------------|----------|----------------------------------------------|---------------------------------------------------|
| Portugal | 105. Pereira A et al. <b>Pre-conception and prenatal care in Braga region.</b> Journal of Neonatal-Perinatal Medicine Conference: 20th European Workshop on Neonatology Tallinn Estonia. Conference Publication: (var pagings) 2012; 5 (2): 2012. | Retro-spective cohort study | 413             | Pregnant women                        | Hospital obstetric department | 291                                 | HBV                           | 70.5     | NA                                           | NA                                                |
| Albania  | 82. Resuli B et al. <b>Epidemiology of hepatitis B virus infection in Albania.</b> <i>World Journal of Gastroenterology</i> 2009, 15:849-852.                                                                                                     | Cross-sectional study       | 640             | Pregnant women                        | NA                            | 640                                 | HBV                           | 100      | 7.3 HBsAg-positive<br>36.3 anti-HBs-positive | NA                                                |
| Germany  | 89. Walz A et al. <b>Vertical transmission of HBV virus (HBV) from mothers negative for HBV surface antigen and positive for antibody to HBV core antigen.</b> <i>The Journal of Infectious Diseases</i> 2009, 200:1227-1231.                     | Cross-sectional study       | 2365            | Pregnant women who are HBsAg-negative | Maternity clinics             | 2365                                | HBV                           | 100      | 6.2 anti-HBc-positive                        | Yes                                               |



| Country                              | Reference                                                                                                                                                                                                                                                                                                                                                                                                                           | Study design          | Sample size (N) | Study population           | Study setting         | Number of study participants tested | Disease test sought to detect | % tested | Viral hepatitis prevalence (%)                                                             | Were study participants informed of test results? |
|--------------------------------------|-------------------------------------------------------------------------------------------------------------------------------------------------------------------------------------------------------------------------------------------------------------------------------------------------------------------------------------------------------------------------------------------------------------------------------------|-----------------------|-----------------|----------------------------|-----------------------|-------------------------------------|-------------------------------|----------|--------------------------------------------------------------------------------------------|---------------------------------------------------|
| <b><i>People living with HIV</i></b> |                                                                                                                                                                                                                                                                                                                                                                                                                                     |                       |                 |                            |                       |                                     |                               |          |                                                                                            |                                                   |
| Netherlands                          | 106. Heiligenberg M et al. <b>Low prevalence of asymptomatic sexually transmitted infections in HIV-infected heterosexuals visiting an HIV clinic in the Netherlands.</b> Sexually Transmitted Infections Conference: 19th Biennial Conference of the International Society for Sexually Transmitted Diseases Research Quebec City, QC Canada Conference Start. Conference Publication: (car pagings 2011; 87 (pp A185-A186): July. | Cross-sectional study | 245             | HIV-positive heterosexuals | HIV outpatient clinic | 245                                 | HBV, HCV                      | 100      | 0<br>HBV-positive (marker not specified)<br><br>0.4<br>HCV-positive (marker not specified) | Yes                                               |

| Country     | Reference                                                                                                                                                                                                                                                                                                                                                      | Study design          | Sample size (N) | Study population | Study setting         | Number of study participants tested | Disease test sought to detect | % tested | Viral hepatitis prevalence (%) | Were study participants informed of test results? |
|-------------|----------------------------------------------------------------------------------------------------------------------------------------------------------------------------------------------------------------------------------------------------------------------------------------------------------------------------------------------------------------|-----------------------|-----------------|------------------|-----------------------|-------------------------------------|-------------------------------|----------|--------------------------------|---------------------------------------------------|
| Netherlands | 107. Matser A et al. <b>Lifestyle as marker of hepatitis C infection in HIV infected MSM in Amsterdam, the Netherlands.</b> Sexually Transmitted Infections Conference: 19th Biennial Conference of the International Society for Sexually transmitted Diseases Research Quebec city, QC Canada. Conference Publication: (var pagings 2011; 87 (pp A49): July. | Cross-sectional study | 850             | HIV-positive MSM | STI outpatient clinic | 850                                 | HCV                           | 100      | 12.7 anti-HCV-positive         | NA                                                |

| Country         | Reference                                                                                                                                                                                               | Study design          | Sample size (N) | Study population    | Study setting | Number of study participants tested | Disease test sought to detect | % tested | Viral hepatitis prevalence (%)                                                                        | Were study participants informed of test results? |
|-----------------|---------------------------------------------------------------------------------------------------------------------------------------------------------------------------------------------------------|-----------------------|-----------------|---------------------|---------------|-------------------------------------|-------------------------------|----------|-------------------------------------------------------------------------------------------------------|---------------------------------------------------|
| <b>Bulgaria</b> | 108. Popinova N et al. <b>Human hepatitis viruses B and C among HIV-infected patients - clinical and epidemiological features.</b> <i>Problems of Infectious and Parasitic Diseases</i> : 37, 2009,1.   | Cross-sectional study | 48              | HIV-positive people | NA            | 48                                  | HBV, HCV                      | 100      | 2.1 HBsAg-positive<br>43.8 anti-HCV-positive<br>4.2 HBsAg-positive and anti-HCV-positive (coinfected) | NA                                                |
| <b>Germany</b>  | 109. Reuter S et al. <b>Prevalence and characteristics of hepatitis B and C virus infections in treatment-naïve HIV-infected patients.</b> <i>Medical Microbiology and Immunology</i> 2011, 200: 39-49. | Cross-sectional study | 918             | HIV-positive people | NA            | 918                                 | HBV, HCV                      | 100      | 4.5 HBsAg-positive<br>10.6 anti-HCV-positive                                                          | NA                                                |

| Country               | Reference                                                                                                                                                                                                                              | Study design                | Sample size (N) | Study population    | Study setting                      | Number of study participants tested | Disease test sought to detect | % tested | Viral hepatitis prevalence (%)               | Were study participants informed of test results? |
|-----------------------|----------------------------------------------------------------------------------------------------------------------------------------------------------------------------------------------------------------------------------------|-----------------------------|-----------------|---------------------|------------------------------------|-------------------------------------|-------------------------------|----------|----------------------------------------------|---------------------------------------------------|
| <b>Slovenia</b>       | 110. Seme K et al. <b>Low prevalence of hepatitis B and C infections among HIV-infected individuals in Slovenia: a nation-wide study, 1986-2008.</b> <i>Acta Dermatovenerologica Alpina, Pannonica et Adriatica</i> 2009, 18: 153-156. | Cross-sectional study       | 409             | HIV-positive people | NA                                 | 356                                 | HBV, HCV                      | 87.0     | 3.9 HBsAg-positive<br>10.7 anti-HCV-positive | NA                                                |
| <b>United Kingdom</b> | 111. Steedman NM. <b>Hepatitis B testing and vaccination in patients recently diagnosed with HIV infection.</b> <i>International Journal of STD and AIDS</i> 2008, 19: 83-84.                                                          | Retro-spective cohort study | 51              | HIV-positive people | Hospital genito-urinary department | 31                                  | HBV                           | 60.8     | 6.5 HBsAg-positive                           | NA                                                |

| Country        | Reference                                                                                                                                                                                                                                           | Study design                | Sample size (N) | Study population    | Study setting         | Number of study participants tested | Disease test sought to detect | % tested | Viral hepatitis prevalence (%) | Were study participants informed of test results? |
|----------------|-----------------------------------------------------------------------------------------------------------------------------------------------------------------------------------------------------------------------------------------------------|-----------------------------|-----------------|---------------------|-----------------------|-------------------------------------|-------------------------------|----------|--------------------------------|---------------------------------------------------|
| United Kingdom | 112. Turner J et al. <b>The prevalence of hepatitis C virus (HCV) infection in HIV-positive individuals in the UK - trends in HCV testing and the impact of HCV on HIV treatment outcomes.</b> <i>Journal of Viral Hepatitis</i> 2010, 17: 569-577. | Retro-spective cohort study | 31,765          | HIV-positive people | NA                    | 20,365                              | HCV                           | 64.1     | 8.9 anti-HCV-positive          | NA                                                |
| Netherlands    | 113. Urbanus AT et al. <b>Hepatitis C virus infections among HIV-infected men who have sex with men: an expanding epidemic.</b> <i>AIDS</i> 2009, 23: F1-F7.                                                                                        | Cross-sectional study       | 689             | HIV-positive MSM    | STI outpatient clinic | 689                                 | HCV                           | 100      | 4.4 anti-HCV-positive          | NA                                                |
| Switzerland    | 114. Wandeler G et al. <b>Hepatitis C Virus Infections in the Swiss HIV Cohort Study: a Rapidly Evolving Epidemic.</b> <i>Clinical Infectious Diseases</i> 2012, 55: 1408-1416.                                                                     | Retro-spective cohort study | 11,837          | HIV-positive people | NA                    | 11,837                              | HCV                           | 100      | 26.4 anti-HCV-positive         | NA                                                |

| Country                   | Reference                                                                                                                                                                                                                         | Study design             | Sample size (N) | Study population                                | Study setting  | Number of study participants tested | Disease test sought to detect | % tested | Viral hepatitis prevalence (%)                                        | Were study participants informed of test results? |
|---------------------------|-----------------------------------------------------------------------------------------------------------------------------------------------------------------------------------------------------------------------------------|--------------------------|-----------------|-------------------------------------------------|----------------|-------------------------------------|-------------------------------|----------|-----------------------------------------------------------------------|---------------------------------------------------|
| France                    | 115. Winnock M et al.<br><b>Prevalence of immunity to hepatitis viruses A and B in a large cohort of HIV HCV-coinfected patients, and factors associated with HAV and HBV vaccination.</b><br><i>Vaccine</i> 2011, 29: 8656-8660. | Prospective cohort study | 1056            | People coinfectd with HIV and HCV               | Hospital wards | 1056                                | HBV                           | 100      | 2.3 HBsAg-positive                                                    | Yes                                               |
| <b>General population</b> |                                                                                                                                                                                                                                   |                          |                 |                                                 |                |                                     |                               |          |                                                                       |                                                   |
| Turkey                    | 116. Akcam F et al.<br><b>Hepatitis B virus and hepatitis C virus seroprevalence in rural areas of the southwestern region of Turkey.</b><br><i>International Journal of Infectious Diseases</i> 2009, 13: 274-284.               | Cross-sectional study    | 2852            | General population in rural southwestern Turkey | NA             | 2852                                | HBV, HCV                      | 100      | 2.5 HBsAg-positive<br>16.2 anti-HBc-positive<br>1.0 anti-HCV-positive | NA                                                |

| Country        | Reference                                                                                                                                                                                                          | Study design             | Sample size (N) | Study population                    | Study setting | Number of study participants tested | Disease test sought to detect | % tested | Viral hepatitis prevalence (%) | Were study participants informed of test results? |
|----------------|--------------------------------------------------------------------------------------------------------------------------------------------------------------------------------------------------------------------|--------------------------|-----------------|-------------------------------------|---------------|-------------------------------------|-------------------------------|----------|--------------------------------|---------------------------------------------------|
| United Kingdom | 117. Brant LJ et al. <b>Diagnosis of acute hepatitis C virus infection and estimated incidence in low- and high-risk English populations.</b> <i>Journal of Viral Hepatitis</i> 2008, 15: 871-877.                 | Prospective cohort study | 3237            | General population                  | NA            | 3237                                | HCV                           | 100      | 0.1 HCV-RNA-positive           | NA                                                |
| United Kingdom | 118. Brant LJ et al. <b>Using automated extraction of hepatitis B tests for surveillance: evidence of decreasing incidence of acute hepatitis B in England.</b> <i>Journal of Viral Hepatitis</i> 2012, 140: June. | Cross-sectional study    | 55,317          | General population                  | NA            | 55,317                              | HBV                           | 100      | 9.4 anti-HBc-positive          | NA                                                |
| United Kingdom | 119. Brant LJ et al. <b>Where are people being tested for anti-HCV in England? Results from sentinel laboratory surveillance.</b> <i>Journal of Viral Hepatitis</i> 2008, 15:729-739.                              | Cross-sectional study    | 503,060         | General population aged 1 and older | NA            | 503,060                             | HCV                           | 100      | 5.5 anti-HCV-positive          | NA                                                |

| Country | Reference                                                                                                                                                                                                                                                                                               | Study design          | Sample size (N) | Study population                                                | Study setting                                                             | Number of study participants tested | Disease test sought to detect | % tested | Viral hepatitis prevalence (%)                                        | Were study participants informed of test results? |
|---------|---------------------------------------------------------------------------------------------------------------------------------------------------------------------------------------------------------------------------------------------------------------------------------------------------------|-----------------------|-----------------|-----------------------------------------------------------------|---------------------------------------------------------------------------|-------------------------------------|-------------------------------|----------|-----------------------------------------------------------------------|---------------------------------------------------|
| Italy   | 120. Cozzolongo R et al. <b>Epidemiology of HCV infection in the general population: a survey in a southern Italian town.</b> <i>American Journal of Gastroenterology</i> 2009, 104: 2740-2746.                                                                                                         | Cross-sectional study | 2195            | General population aged 18 and older in a southern Italian town | National Institute of Gastroenterology and general practitioner practices | 2195                                | HBV, HCV                      | 100      | 0.5 HBsAg-positive<br>12.0 anti-HBc-positive<br>2.6 anti-HCV-positive | NA                                                |
| France  | 121. Defossez G et al. <b>Evaluation of the French national plan to promote screening and early management of viral hepatitis C between 1997 and 2003: a comparative cross-sectional study in Poitou-Charentes region.</b> <i>European Journal of Gastroenterology and Hepatology</i> 2008, 20:367-372. | Cross-sectional study | 20,920          | General population in a region of southern France               | NA                                                                        | 20,920                              | HCV                           | 100      | 1.5 HCV-positive (marker not specified)                               | Yes                                               |



| Country | Reference                                                                                                                                                                                                                                    | Study design                         | Sample size (N) | Study population                                                   | Study setting                   | Number of study participants tested | Disease test sought to detect | % tested | Viral hepatitis prevalence (%)              | Were study participants informed of test results? |
|---------|----------------------------------------------------------------------------------------------------------------------------------------------------------------------------------------------------------------------------------------------|--------------------------------------|-----------------|--------------------------------------------------------------------|---------------------------------|-------------------------------------|-------------------------------|----------|---------------------------------------------|---------------------------------------------------|
| France  | 122. Delarocque-Astagneau E et al. <b>The impact of the prevention programme of hepatitis C over more than a decade: the French experience.</b> <i>Journal of Viral Hepatitis</i> 2010, 17: 435-443.                                         | Retro-spective cross-sectional study | 14,416          | General population                                                 | Social Security Medical Centres | 14,416                              | HCV                           | 100      | NA                                          | Yes                                               |
| Italy   | 123. Fabris P et al. <b>Changing epidemiology of HCV and HBV infections in Northern Italy. A survey in the general population.</b> <i>Journal of Clinical Gastroenterology</i> 2008, 42.                                                     | Cross-sectional study                | 965             | General population in northeastern Italy                           | NA                              | 965                                 | HBV, HCV                      | 100      | 1.0 HBsAg-positive<br>2.6 anti-HCV-positive | No (testing was anonymous)                        |
| Turkey  | 124. Ozkan S et al. <b>Community-based research: cost of the tests used for anti-HBc total seropositivity only and hepatitis B screening.</b> <i>Transactions of the Royal Society of Tropical Medicine and Hygiene</i> 2010, 104: December. | Cross-sectional study                | 452             | General population aged 15 and older in a suburb of Ankara, Turkey | NA                              | 452                                 | HBV                           | 100      | 42.5 anti-HBc-positive                      | NA                                                |

| Country | Reference                                                                                                                                                                                                          | Study design          | Sample size (N) | Study population                          | Study setting | Number of study participants tested | Disease test sought to detect | % tested | Viral hepatitis prevalence (%)                                        | Were study participants informed of test results? |
|---------|--------------------------------------------------------------------------------------------------------------------------------------------------------------------------------------------------------------------|-----------------------|-----------------|-------------------------------------------|---------------|-------------------------------------|-------------------------------|----------|-----------------------------------------------------------------------|---------------------------------------------------|
| Greece  | 125. Zacharakis G et al.<br><b>Changes in the epidemiology of hepatitis B virus infection following the implementation of immunisation programmes in northeastern Greece.</b><br><i>Eurosurveillance</i> 2009, 14. | Cross-sectional study | 6876            | General population in northeastern Greece | NA            | 6876                                | HBV                           | 100      | 2.0 HBsAg-positive<br>26.1 anti-HBs-positive<br>3.3 anti-HBc-positive | NA                                                |

| Country                    | Reference                                                                                                                                                                                                                                                                                                                     | Study design          | Sample size (N) | Study population | Study setting                        | Number of study participants tested | Disease test sought to detect | % tested | Viral hepatitis prevalence (%)                | Were study participants informed of test results? |
|----------------------------|-------------------------------------------------------------------------------------------------------------------------------------------------------------------------------------------------------------------------------------------------------------------------------------------------------------------------------|-----------------------|-----------------|------------------|--------------------------------------|-------------------------------------|-------------------------------|----------|-----------------------------------------------|---------------------------------------------------|
| <b><i>Blood donors</i></b> |                                                                                                                                                                                                                                                                                                                               |                       |                 |                  |                                      |                                     |                               |          |                                               |                                                   |
| <b>Turkey</b>              | 126. Acar A et al. <b>The significance of repeat testing in Turkish blood donors screened with HBV, HCV and HIV immunoassays and the importance of S/CO ratios in the interpretation of HCV/HIV screening test results and as a determinant for further confirmatory testing.</b> <i>Transfusion Medicine</i> 2010, 20: June. | Cross-sectional study | 72,695          | Blood donors     | None (blood donor samples evaluated) | 72,695                              | HBV, HCV                      | 100      | 1.9 HBsAg-positive<br>0.5 anti-HCV-positive   | NA                                                |
| <b>Italy</b>               | 127. Dettori S et al. <b>Identification of low HBV-DNA levels by nucleic acid amplification test (NAT) in blood donors.</b> <i>Journal of Infection</i> 2009, 59: 128-133.                                                                                                                                                    | Cross-sectional study | 22,765          | Blood donors     | Hospital transfusion centre          | 22,765                              | HBV, HCV                      | 100      | 0.05 HBsAg-positive<br>0.06 anti-HCV-positive | NA                                                |

| Country | Reference                                                                                                                                                                                                                                                                          | Study design                | Sample size (N) | Study population | Study setting         | Number of study participants tested | Disease test sought to detect | % tested | Viral hepatitis prevalence (%)              | Were study participants informed of test results? |
|---------|------------------------------------------------------------------------------------------------------------------------------------------------------------------------------------------------------------------------------------------------------------------------------------|-----------------------------|-----------------|------------------|-----------------------|-------------------------------------|-------------------------------|----------|---------------------------------------------|---------------------------------------------------|
| Poland  | 54. Ganczak M et al. <b>Seroprevalence of hepatitis C virus infection among surgical nurses, their patients and blood donation candidates in Poland.</b> <i>Journal of Hospital Infection</i> 2012, 82: 266-270.                                                                   | Cross-sectional study       | 801             | Blood donors     | Blood donation centre | 801                                 | HCV                           | 100      | 0 anti-HCV-positive                         | Yes                                               |
| Turkey  | 78. Karaosmanoglu HK et al. <b>Seroprevalence of hepatitis B: do blood donors represent the general population?</b> <i>Journal of Infection in Developing Countries</i> 2012, 6:181-183.                                                                                           | Retro-spective cohort study | 9949            | Blood donors     | Blood donation centre | 9949                                | HBV                           | 100      | 1.8 HBsAg-positive                          | NA                                                |
| Poland  | 128. Kazmierczak M et al. <b>Prevalence of viruses HBV, HCV and HIV in blood donors at the Regional Centre of Blood Donation and Blood Treatment in Poznan in the years 2008-2010.</b> <i>Annales Universitatis Mariae Curie-Sklodowska, Sectio DDD: Pharmacia</i> 2012, 25: 2012. | Cross-sectional study       | 148,320         | Blood donors     | Blood donation centre | 148,320                             | HBV, HCV                      | 100      | 0.2 HBsAg-positive<br>0.1 anti-HCV-positive | NA                                                |

| Country | Reference                                                                                                                                                                                                             | Study design                | Sample size (N) | Study population | Study setting             | Number of study participants tested | Disease test sought to detect | % tested | Viral hepatitis prevalence (%)               | Were study participants informed of test results? |
|---------|-----------------------------------------------------------------------------------------------------------------------------------------------------------------------------------------------------------------------|-----------------------------|-----------------|------------------|---------------------------|-------------------------------------|-------------------------------|----------|----------------------------------------------|---------------------------------------------------|
| Turkey  | 129. Oner S et al. <b>Hepatitis B, hepatitis C, HIV, and VDRL seroprevalence of blood donors in Mersin, Turkey.</b> <i>Turkish Journal of Medical Sciences</i> 2011, 41: 2011.                                        | Retro-spective cohort study | 30,716          | Blood donors     | Blood donation centre     | 30,716                              | HBV, HCV                      | 100      | 2.2 HbsAg-positive<br>0.4 anti-HCV-positive  | NA                                                |
| Albania | 82. Resuli B et al. <b>Epidemiology of hepatitis B virus infection in Albania.</b> <i>World Journal of Gastroenterology</i> 2009, 15:849-852.                                                                         | Cross-sectional study       | 1664            | Blood donors     | Blood donation centre     | 1664                                | HBV                           | 100      | 9.1 HBsAg-positive<br>24.3 anti-HBs-positive | NA                                                |
| Italy   | 130. Romano L et al. <b>Hepatitis B virus infection among first-time blood donors in Italy: Prevalence and correlates between serological patterns and occult infection.</b> <i>Blood transfusion</i> 2013, 11: 2013. | Prospective cohort study    | 31,190          | Blood donors     | Blood transfusion centres | 31,190                              | HBV                           | 100      | 0.3 HBsAg-positive<br>8.6% anti-HBc-positive | NA                                                |

| Country | Reference                                                                                                                                                                                                                                                | Study design          | Sample size (N) | Study population | Study setting             | Number of study participants tested | Disease test sought to detect | % tested | Viral hepatitis prevalence (%)              | Were study participants informed of test results? |
|---------|----------------------------------------------------------------------------------------------------------------------------------------------------------------------------------------------------------------------------------------------------------|-----------------------|-----------------|------------------|---------------------------|-------------------------------------|-------------------------------|----------|---------------------------------------------|---------------------------------------------------|
| Germany | 131. Wiegand J et al. <b>Autologous blood donor screening indicated a lower prevalence of viral hepatitis in East vs West Germany: epidemiological benefit from established health resources.</b> <i>Journal of Viral Hepatitis</i> , 2009, 16: 743-748. | Cross-sectional study | 36,139          | Blood donors     | Blood transfusion centres | 36,139                              | HBV, HCV                      | 100      | 0.3 HBsAg-positive<br>0.3 anti-HCV-positive | No                                                |

| Country                | Reference                                                                                                                                                                                                                                                                                                                                                                                          | Study design             | Sample size (N) | Study population                                                     | Study setting        | Number of study participants tested | Disease test sought to detect | % tested | Viral hepatitis prevalence (%)              | Were study participants informed of test results? |
|------------------------|----------------------------------------------------------------------------------------------------------------------------------------------------------------------------------------------------------------------------------------------------------------------------------------------------------------------------------------------------------------------------------------------------|--------------------------|-----------------|----------------------------------------------------------------------|----------------------|-------------------------------------|-------------------------------|----------|---------------------------------------------|---------------------------------------------------|
| <b><i>Migrants</i></b> |                                                                                                                                                                                                                                                                                                                                                                                                    |                          |                 |                                                                      |                      |                                     |                               |          |                                             |                                                   |
| Germany                | 132. Heidrich B et al. <b>High Prevalence of Hepatitis Marker in Immigrant Populations: A Prospective Multicenter Screening Approach in a Real World Setting.</b> Journal of Hepatology Conference: 47th Annual Meeting of the European Association for the Study of the Liver, International Liver Congress 2012 Barcelona Spain. Conference Publication: (var pagings) 2012; 56(pp S386): April. | Prospective cohort study | 1116            | Migrants/immigrants attending primary health care clinics in Germany | Primary care centres | 1116                                | HBV, HCV                      | 100      | 3.7 HBsAg-positive<br>2.1 anti-HCV-positive | Yes                                               |

| Country        | Reference                                                                                                                                                                                                                                                                                                 | Study design                  | Sample size (N)                          | Study population                                           | Study setting                                          | Number of study participants tested | Disease test sought to detect | % tested                              | Viral hepatitis prevalence (%)                                                                                | Were study participants informed of test results? |
|----------------|-----------------------------------------------------------------------------------------------------------------------------------------------------------------------------------------------------------------------------------------------------------------------------------------------------------|-------------------------------|------------------------------------------|------------------------------------------------------------|--------------------------------------------------------|-------------------------------------|-------------------------------|---------------------------------------|---------------------------------------------------------------------------------------------------------------|---------------------------------------------------|
| United Kingdom | 133. Jafferbhoy H et al. <b>The effectiveness of outreach testing for hepatitis C in an immigrant Pakistani population.</b> <i>Epidemiology and Infection</i> 2012, 140: June.                                                                                                                            | Intervention study            | 250 <sup>5</sup>                         | Immigrant Pakistani community in Scotland (United Kingdom) | Community-based outreach clinics for hepatitis testing | 170                                 | HBV, HCV                      | 68.0                                  | 0.6 HBsAg-positive<br>4.1 anti-HCV-positive                                                                   | NA                                                |
| United Kingdom | 134. Lewis H et al. <b>What is the best method of case finding for chronic viral hepatitis in migrant communities?</b> Gut Conference: British Association for the study of the Liver Annual Meeting, BASL 2011 London United Kingdom Conference publication: (var pagings) 2011; 60 (pp A26): September. | Multi-arm observational study | Arm 1: 5000<br>Arm 2: 1163<br>Arm 3: 600 | Pakistan natives living in the United Kingdom              | General practitioner/primary care practices            | Arm 1: 0<br>Arm 2: 17<br>Arm 3: 223 | HBV, HCV                      | Arm 1: 0<br>Arm 2: 1.5<br>Arm 3: 37.2 | Arm 1: NA<br>Arm 2: 0 HBsAg-positive; 0 anti-HCV positive<br>Arm 3: 1.0 HBsAg-positive; 2.4 anti-HCV positive | NA                                                |

<sup>5</sup> Estimated by authors.



| Country     | Reference                                                                                                                                                                                             | Study design          | Sample size (N) | Study population                                       | Study setting                                                                              | Number of study participants tested | Disease test sought to detect | % tested | Viral hepatitis prevalence (%)               | Were study participants informed of test results? |
|-------------|-------------------------------------------------------------------------------------------------------------------------------------------------------------------------------------------------------|-----------------------|-----------------|--------------------------------------------------------|--------------------------------------------------------------------------------------------|-------------------------------------|-------------------------------|----------|----------------------------------------------|---------------------------------------------------|
| Greece      | 135. Milionis C et al.<br><b>Serological markers of hepatitis B and C among juvenile immigrants from Albania settled in Greece.</b><br><i>European Journal of General Practice</i> 2010, 16: 236-240. | Cross-sectional study | 504             | Recent Albanian immigrants aged 10–23 living in Greece | Hospital blood donation department                                                         | 504                                 | HBV, HCV                      | 100      | 11.7 HBsAg-positive<br>0.6 anti-HCV-positive | NA                                                |
| Netherlands | 136. Richter C et al.<br><b>Hepatitis B prevalence in the Turkish population of Arnhem: Implications for national screening policy?</b><br><i>Epidemiology and Infection</i> 2012, 104: April.        | Cross-sectional study | 709             | Turkish migrants in the Netherlands                    | Mobile laboratory at Turkish community centres and mosques; general practitioner practices | 709                                 | HBV, HCV                      | 100      | 3.0 HBsAg-positive<br>0.4 anti-HCV-positive  | Yes                                               |

| Country     | Reference                                                                                                                                                                                                                                | Study design                | Sample size (N) | Study population                                          | Study setting                                                                                                          | Number of study participants tested | Disease test sought to detect | % tested | Viral hepatitis prevalence (%)                                        | Were study participants informed of test results? |
|-------------|------------------------------------------------------------------------------------------------------------------------------------------------------------------------------------------------------------------------------------------|-----------------------------|-----------------|-----------------------------------------------------------|------------------------------------------------------------------------------------------------------------------------|-------------------------------------|-------------------------------|----------|-----------------------------------------------------------------------|---------------------------------------------------|
| Italy       | 137. Tramuto F et al. <b>Serological pattern of hepatitis B, C, and HIV infections among immigrants in Sicily: Epidemiological aspects and implication on public health.</b> <i>Journal of Community Health</i> 2012, 37: 547-553.       | Retro-spective cohort study | 393             | Immigrants attending an outpatient health clinic in Italy | Hospital outpatient clinic for immigrants                                                                              | 393                                 | HBV, HCV                      | 100      | 10.7 HBsAg-positive<br>5.6 anti-HCV-positive                          | NA                                                |
| Netherlands | 138. Veldhuijzen IK et al. <b>Identification and treatment of chronic hepatitis B in Chinese migrants: Results of a project offering on-site testing in Rotterdam, The Netherlands.</b> <i>Journal of Hepatology</i> 2012, 57: December. | Cross-sectional study       | 1090            | Chinese community in the Netherlands                      | Outreach locations such as Chinese community centres, schools and churches; municipal public health service facilities | 1090                                | HBV                           | 100      | 0.7 HBsAg-positive<br>20.4 anti-HBc-positive<br>1.1 anti-HCV-positive | Yes                                               |

| Country            | Reference                                                                                                                                                                                                                                       | Study design          | Sample size (N) | Study population                                             | Study setting                                                        | Number of study participants tested | Disease test sought to detect | % tested                         | Viral hepatitis prevalence (%)                                                         | Were study participants informed of test results? |
|--------------------|-------------------------------------------------------------------------------------------------------------------------------------------------------------------------------------------------------------------------------------------------|-----------------------|-----------------|--------------------------------------------------------------|----------------------------------------------------------------------|-------------------------------------|-------------------------------|----------------------------------|----------------------------------------------------------------------------------------|---------------------------------------------------|
| <b>Netherlands</b> | 139. Veldhuijzen IK et al.<br><b>Viral hepatitis in a multi-ethnic neighborhood in the Netherlands: results of a community-based study in a low prevalence country.</b><br><i>International Journal of Infectious Diseases</i> 2009, 13:e9-e13. | Cross-sectional study | 288             | Residents of a multi-ethnic neighbourhood in the Netherlands | Community centre in multi-ethnic neighbourhood                       | HBV: 284<br>HCV: 271                | HBV,<br>HCV                   | HBV:<br>98.6<br><br>HCV:<br>94.1 | 20.0<br>anti-HBc-positive<br><br>1.1<br>anti-HCV-positive                              | NA                                                |
| <b>Greece</b>      | 125. Zacharakis G et al.<br><b>Changes in the epidemiology of hepatitis B virus infection following the implementation of immunisation programmes in northeastern Greece.</b><br><i>Eurosurveillance</i> 2009, 14.                              | Cross-sectional study | 3746            | Selected groups of immigrants in northeastern Greece         | None<br>(community-based serosurvey conducted by mobile survey unit) | 3746                                | HBV                           | 100                              | 4.4<br>HBsAg-positive<br><br>37.8<br>anti-HBs-positive<br><br>3.4<br>anti-HBc-positive | NA                                                |

| Country                                     | Reference                                                                                                                                                        | Study design             | Sample size (N)      | Study population               | Study setting | Number of study participants tested | Disease test sought to detect | % tested             | Viral hepatitis prevalence (%)                                         | Were study participants informed of test results? |
|---------------------------------------------|------------------------------------------------------------------------------------------------------------------------------------------------------------------|--------------------------|----------------------|--------------------------------|---------------|-------------------------------------|-------------------------------|----------------------|------------------------------------------------------------------------|---------------------------------------------------|
| <b><i>Current/former prison inmates</i></b> |                                                                                                                                                                  |                          |                      |                                |               |                                     |                               |                      |                                                                        |                                                   |
| Portugal                                    | 140. Barros H et al. <b>A survey of HIV and HCV among female prison inmates in Portugal.</b> <i>Central European Journal of Public Health</i> 2008, 16: 116-120. | Cross-sectional study    | 502                  | Female prison inmates          | Prison        | 415                                 | HCV                           | 88.6                 | 10.6 anti-HCV-positive                                                 | Yes                                               |
| United Kingdom                              | 141. Kirwan P et al. <b>Hepatitis C and B testing in English prisons is low but increasing.</b> <i>Journal of Public Health (Oxf)</i> 2011, 33: 197-204.         | Prospective cohort study | 318,550 <sup>6</sup> | Male and female prison inmates | Prisons       | HBV: 8416<br>HCV: 9956              | HBV, HCV                      | HBV: 2.6<br>HCV: 3.1 | 1.3 HBsAg-positive<br>13.9 anti-HBc-positive<br>24.2 anti-HCV-positive | NA                                                |

<sup>6</sup> Estimated by study authors.

| Country        | Reference                                                                                                                                                                                                                            | Study design                | Sample size (N) | Study population                 | Study setting | Number of study participants tested | Disease test sought to detect | % tested | Viral hepatitis prevalence (%)               | Were study participants informed of test results? |
|----------------|--------------------------------------------------------------------------------------------------------------------------------------------------------------------------------------------------------------------------------------|-----------------------------|-----------------|----------------------------------|---------------|-------------------------------------|-------------------------------|----------|----------------------------------------------|---------------------------------------------------|
| Portugal       | 142. Marques NM et al. <b>Seroepidemiological survey of transmissible infectious diseases in a Portuguese prison establishment.</b> <i>Brazilian Journal of Infectious Diseases</i> 2011, 15: 272-275.                               | Cross-sectional study       | 151             | Male prison inmates              | Prison        | 151                                 | HBV, HCV                      | 100      | 0.7 HBsAg-positive<br>34.4 anti-HCV-positive | Yes                                               |
| United Kingdom | 143. Murray E, Jones D. <b>Audit into blood-borne virus services in Her Majesty's Prison Service.</b> <i>International Journal of STD and AIDS</i> 2008, 19: 347-348.                                                                | Retro-spective cohort study | 179             | Female prison inmates            | Prisons       | 34                                  | HCV                           | 19.0     | 35.3 anti-HCV-positive                       | Yes                                               |
| Italy          | 144. Pontali E, Ferrari F. <b>Prevalence of hepatitis B virus and/or hepatitis C virus co-infection in prisoners infected with the Human Immunodeficiency Virus.</b> <i>International Journal of Prisoner Health</i> 2008, 4: 77-82. | Prospective cohort study    | 173             | HIV-positive male prison inmates | Prison        | 164                                 | HBV, HCV                      | 94.8     | 6.7 HBsAg-positive<br>77.4 anti-HCV-positive | Yes                                               |

| Country  | Reference                                                                                                                                                                                 | Study design          | Sample size (N) | Study population               | Study setting | Number of study participants tested | Disease test sought to detect | % tested | Viral hepatitis prevalence (%)                   | Were study participants informed of test results? |
|----------|-------------------------------------------------------------------------------------------------------------------------------------------------------------------------------------------|-----------------------|-----------------|--------------------------------|---------------|-------------------------------------|-------------------------------|----------|--------------------------------------------------|---------------------------------------------------|
| Bulgaria | 145. Popov G et al. <b>Prevalence of Viral Hepatitis, Human Immunodeficiency Virus and Syphilis among Inmates of Bulgarian Prisons.</b> <i>Journal of Hepatology</i> 2013, 58: S229-S407. | Cross-sectional study | 658             | Male and female prison inmates | Prisons       | 658                                 | HBV, HCV                      | 100      | 60.2 anti-HBc-positive<br>28.6 anti-HCV-positive | No (testing was anonymous)                        |

| Country | Reference                                                                                                                                                                                                                                          | Study design          | Sample size (N) | Study population               | Study setting | Number of study participants tested | Disease test sought to detect | % tested        | Viral hepatitis prevalence (%)                                   | Were study participants informed of test results? |
|---------|----------------------------------------------------------------------------------------------------------------------------------------------------------------------------------------------------------------------------------------------------|-----------------------|-----------------|--------------------------------|---------------|-------------------------------------|-------------------------------|-----------------|------------------------------------------------------------------|---------------------------------------------------|
| Hungary | 86. Tresó B et al. <b>Prevalence and Correlates of HCV, HVB, and HIV infection among prison inmates and staff, Hungary.</b> <i>Journal of Urban Health</i> 2012, 89: 108-116.                                                                      | Cross-sectional study | 4894            | Male and female prison inmates | Prison        | 4894                                | HBV, HCV                      | 100             | 1.5 HBsAg-positive<br>4.9 anti-HCV-positive                      | NA                                                |
| France  | 146. Verneuil L et al. <b>Prevalence and risk factors of the whole spectrum of sexually transmitted diseases in male incoming prisoners in France.</b> <i>European Journal of Clinical Microbiology and Infectious Diseases</i> 2009, 28: 409-413. | Cross-sectional study | 597             | Male prison inmates            | Prisons       | 442 <sup>7</sup>                    | HBV, HCV                      | 74 <sup>8</sup> | 0.3 HBV-positive (marker not specified)<br>4.8 anti-HCV-positive | NA                                                |

<sup>7</sup> Approximation.

<sup>8</sup> Approximation

| Country                    | Reference                                                                                                                                                                                                        | Study design               | Sample size (N) | Study population                                   | Study setting                    | Number of study participants tested | Disease test sought to detect | % tested | Viral hepatitis prevalence (%)                | Were study participants informed of test results? |
|----------------------------|------------------------------------------------------------------------------------------------------------------------------------------------------------------------------------------------------------------|----------------------------|-----------------|----------------------------------------------------|----------------------------------|-------------------------------------|-------------------------------|----------|-----------------------------------------------|---------------------------------------------------|
| <b>Health care workers</b> |                                                                                                                                                                                                                  |                            |                 |                                                    |                                  |                                     |                               |          |                                               |                                                   |
| Poland                     | 52. Flisiak R et al. <b>Prevalence and risk factors of HCV infection in Poland.</b> <i>European Journal of Gastroenterology and Hepatology</i> 2011, 23: 1213-1217.                                              | Cross-sectional study      | 9029            | Health care workers                                | Hospitals and outpatient clinics | 9029                                | HCV                           | 100      | 1.4 anti-HCV-positive<br>0.4 HCV-RNA-positive | NA                                                |
| Poland                     | 54. Ganczak M et al. <b>Seroprevalence of hepatitis C virus infection among surgical nurses, their patients and blood donation candidates in Poland.</b> <i>Journal of Hospital Infection</i> 2012, 82: 266-270. | Cross-sectional study      | 414             | Surgical nurses and midwives                       | Hospitals                        | 414                                 | HCV                           | 100      | 1.4 anti-HCV-positive                         | Yes                                               |
| Germany                    | 64. Ross RS et al. <b>Transmission of hepatitis C virus in an orthopaedic hospital ward.</b> <i>Journal of Medical Virology</i> 2009, 81: 249-257.                                                               | Retrospective cohort study | 104             | Health care workers in a hospital orthopaedic ward | Hospital orthopaedic ward        | 104                                 | HCV                           | 100      | 1.0 HCV-positive (marker unreported)          | Yes                                               |



| Country            | Reference                                                                                                                                                                                                                                      | Study design          | Sample size (N) | Study population     | Study setting           | Number of study participants tested | Disease test sought to detect | % tested | Viral hepatitis prevalence (%)                                          | Were study participants informed of test results? |
|--------------------|------------------------------------------------------------------------------------------------------------------------------------------------------------------------------------------------------------------------------------------------|-----------------------|-----------------|----------------------|-------------------------|-------------------------------------|-------------------------------|----------|-------------------------------------------------------------------------|---------------------------------------------------|
| <b>Poland</b>      | 147. Slusarczyk J et al. <b>Cross-sectional, anonymous screening for asymptomatic HCV infection, immunity to HBV, and occult HBV infection among health care workers in Warsaw, Poland.</b> <i>Przegląd Epidemiologiczny</i> 2012, 66:445-451. | Cross-sectional study | 961             | Health care workers  | Hospitals               | 961                                 | HBV, HCV                      | 100      | 15.7 anti-HBc-positive<br>1.7 anti-HCV-positive<br>0.3 HCV-RNA-positive | No (testing was anonymous)                        |
| <b>Greece</b>      | 148. Topka D et al. <b>Prevalence of hepatitis B in haemodialysis nursing staff in Athens.</b> <i>Journal of Renal Care</i> 2012, 38: 76-81.                                                                                                   | Cross-sectional study | 216             | Haemodialysis nurses | Haemodialysis units     | 216                                 | HBV                           | 100      | 0.5 HBsAg-positive                                                      | NA                                                |
| <b>Netherlands</b> | 149. Zaaijer HL et al. <b>Hepatitis C virus infection among transmission-prone medical personnel.</b> <i>European Journal of Clinical Microbiology and Infectious Diseases</i> 2012, 31: 1473-1477.                                            | Cross-sectional study | 729             | Health care workers  | Academic medical centre | 729                                 | HCV                           | 100      | 1.4 anti-HCV-positive                                                   | No (testing was anonymous)                        |

| Country                                 | Reference                                                                                                                                                                                                                         | Study design          | Sample size (N) | Study population | Study setting             | Number of study participants tested | Disease test sought to detect | % tested | Viral hepatitis prevalence (%)                                        | Were study participants informed of test results? |
|-----------------------------------------|-----------------------------------------------------------------------------------------------------------------------------------------------------------------------------------------------------------------------------------|-----------------------|-----------------|------------------|---------------------------|-------------------------------------|-------------------------------|----------|-----------------------------------------------------------------------|---------------------------------------------------|
| <b><i>Men who have sex with men</i></b> |                                                                                                                                                                                                                                   |                       |                 |                  |                           |                                     |                               |          |                                                                       |                                                   |
| <b>Croatia</b>                          | 150. Bozicevic I et al. <b>Prevalence of HIV and sexually transmitted infections and patterns of recent HIV testing among men who have sex with men in Zagreb, Croatia.</b> <i>AIDS Behavior</i> 2009, 13: 303-309.               | Cross-sectional study | 387             | MSM              | Hospital-based HIV centre | 387                                 | HBV, HCV                      | 100      | 0.8 HBsAg-positive<br>44.0 anti-HBs-positive<br>6.9 anti-HBc-positive | NA                                                |
| <b>Italy</b>                            | 151. Di Benedetto MA et al. <b>Prevalence of sexually transmitted infections and enteric protozoa among homosexual men in western Sicily (south Italy).</b> <i>Journal of preventive Medicine and Hygiene</i> 2012, 53: December. | Cross-sectional study | 74              | MSM              | NA                        | 74                                  | HCV                           | 100      | 0 HCV-positive (marker not specified)                                 | Yes                                               |

| Country        | Reference                                                                                                                                                                                         | Study design               | Sample size (N) | Study population | Study setting                   | Number of study participants tested | Disease test sought to detect | % tested | Viral hepatitis prevalence (%)                                         | Were study participants informed of test results? |
|----------------|---------------------------------------------------------------------------------------------------------------------------------------------------------------------------------------------------|----------------------------|-----------------|------------------|---------------------------------|-------------------------------------|-------------------------------|----------|------------------------------------------------------------------------|---------------------------------------------------|
| Belgium        | 152. Platteau T et al.<br><b>Voluntary outreach counselling and testing for HIV and STI among men who have sex with men in Antwerp.</b> <i>Acta Clinica Belgica</i> 2012, 67: 172-176.            | Cross-sectional study      | 137             | MSM              | Gay sauna; gay fetish club      | 137                                 | HBV, HCV                      | 100      | 0.7 HCV-positive (marker not specified)                                | Yes                                               |
| United Kingdom | 153. Scott C et al.<br><b>Unselected hepatitis C screening of men who have sex with men attending sexual health clinics.</b> <i>Journal of infection</i> 2010; 60(5):351-353                      | Cross-sectional study      | 5230            | MSM              | Sexual health clinics           | 3365                                | HCV                           | 68.6     | 0.7 anti-HCV-positive                                                  | Yes                                               |
| Netherlands    | 44. van Houdt R et al.<br><b>Unexpectedly high proportion of drug users and men having sex with men who develop chronic hepatitis B infection.</b> <i>Journal of Hepatology</i> 2012, 57:529-533. | Retrospective cohort study | 1862            | MSM              | Public Health Service Amsterdam | 1862                                | HBV                           | 100      | 12.0 HBsAg-positive<br>44.0 anti-HBc-positive<br>1.2 anti-HCV-positive | No                                                |

| Country                                       | Reference                                                                                                                                                                                                                   | Study design               | Sample size (N) | Study population                                                                        | Study setting | Number of study participants tested | Disease test sought to detect | % tested | Viral hepatitis prevalence (%) | Were study participants informed of test results? |
|-----------------------------------------------|-----------------------------------------------------------------------------------------------------------------------------------------------------------------------------------------------------------------------------|----------------------------|-----------------|-----------------------------------------------------------------------------------------|---------------|-------------------------------------|-------------------------------|----------|--------------------------------|---------------------------------------------------|
| <b><i>Children born to HBsAg+ mothers</i></b> |                                                                                                                                                                                                                             |                            |                 |                                                                                         |               |                                     |                               |          |                                |                                                   |
| <b>Netherlands</b>                            | 154. Boot HJ et al. <b>Persistent and transient hepatitis B virus (HBV) infections in children born to HBV-infected mothers despite active and passive vaccination.</b> <i>Journal of Viral Hepatitis</i> 2010, 17:872-878. | Cross-sectional study      | 2280            | Infants born to HBsAg-positive mothers                                                  | NA            | 1743                                | HBV                           | 75.4     | 0.7 HBsAg-positive             | NA                                                |
| <b>Italy</b>                                  | 155. Bracciale L et al. <b>Impact of hepatitis B vaccination in children born to HBsAg-positive mothers: a 20-year retrospective study.</b> <i>Infection</i> 2009, 37: 340-343.                                             | Retrospective cohort study | 100             | People born to HBsAg-positive mothers who received post-exposure prophylaxis, 1984–2004 | NA            | 100                                 | HBV                           | 100      | 2.0 anti-HBc-positive          | NA                                                |
